# Supplementary material
Source: publisher site journal article supplement (https://www.dovepress.com/article/533551)
Supplement: Supplementary file 1 [file 533551%20Revised%20Supplementary%20Materials_1.docx]

**
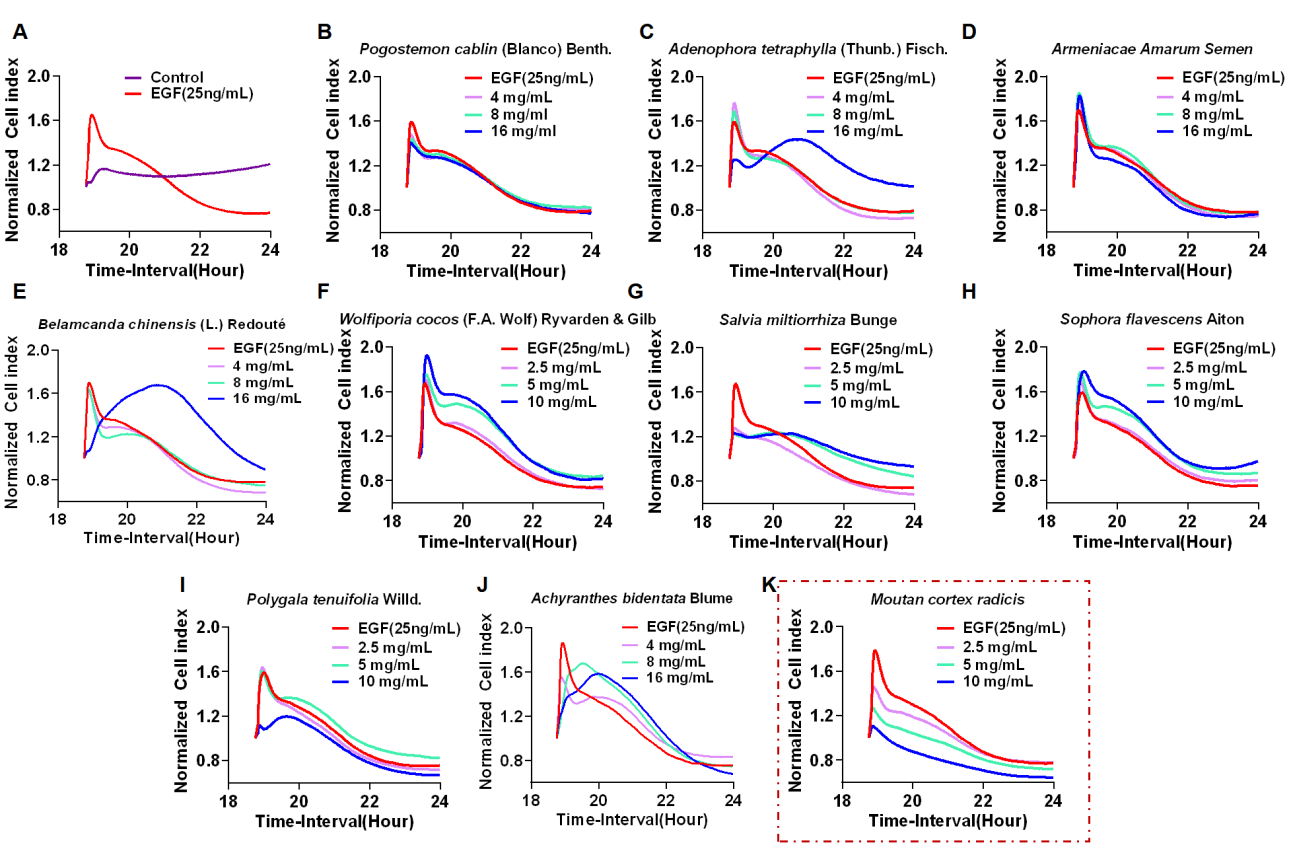
**

**Supplementary Figure 1: The TCRPs of several Traditional Chinese Medicinal screening based on the FAK-TCRPs.** (A) The TCRPs of EGF induction models were recorded by xCELLigence system. (B-K) *Pogostemon cablin* (Blanco) Benth*., Adenophora tetraphylla* (Thunb.)Fisch*., Salvia miltiorrhiza* Bunge*, Belamcanda chinensis* (L.) Redouté)*, Achyranthes bidentata* Blume*, F.A. Sophora flavescens* Aiton*, Polygala tenuifolia* Willd.*, Wolfiporia cocos* (F.A. Wolf) Ryvarden & Gilb.*,* Armeniacae Amarum Semen*, Moutan cortex radicis’*s TRCP were recorded by xCELLigence system in FAK-TCRPs model. A red dashed box highlights *Moutan cortex radicis*’s TRCP.

**Supplementary Material 1**：**Analysis injection list**

**Component name: (Z)-(1S,5R)-β-Pinen-10-yl-β-vicianoside**

Channel name: (Z)-(1S,5R)-β-Pinen-10-yl-β-vicianoside [-H] : (10.00mDa)445.2078


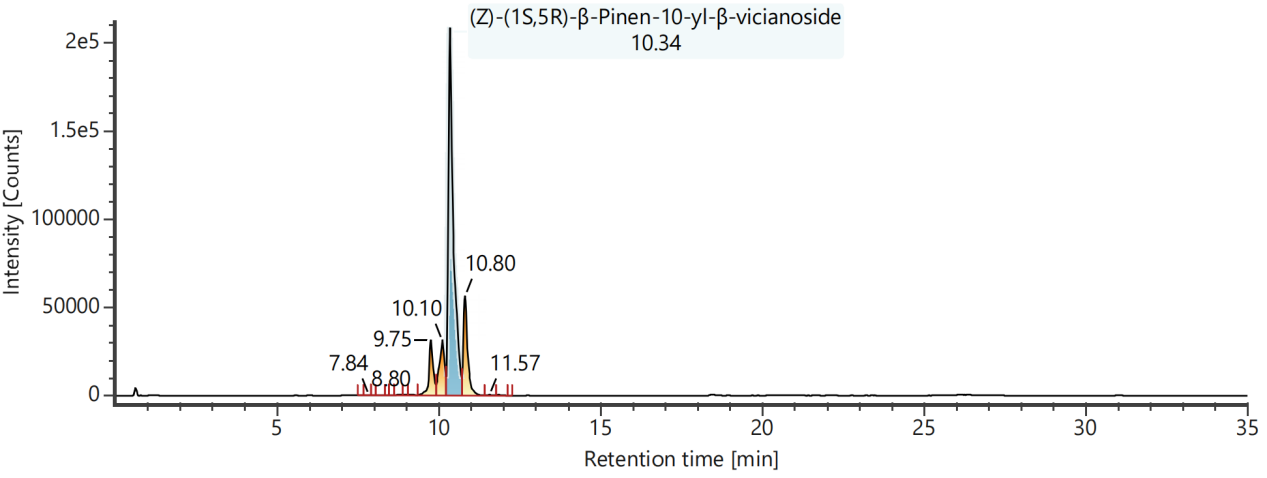


Channel name: Low energy : Time 10.3524 +/- 0.0740 minutes


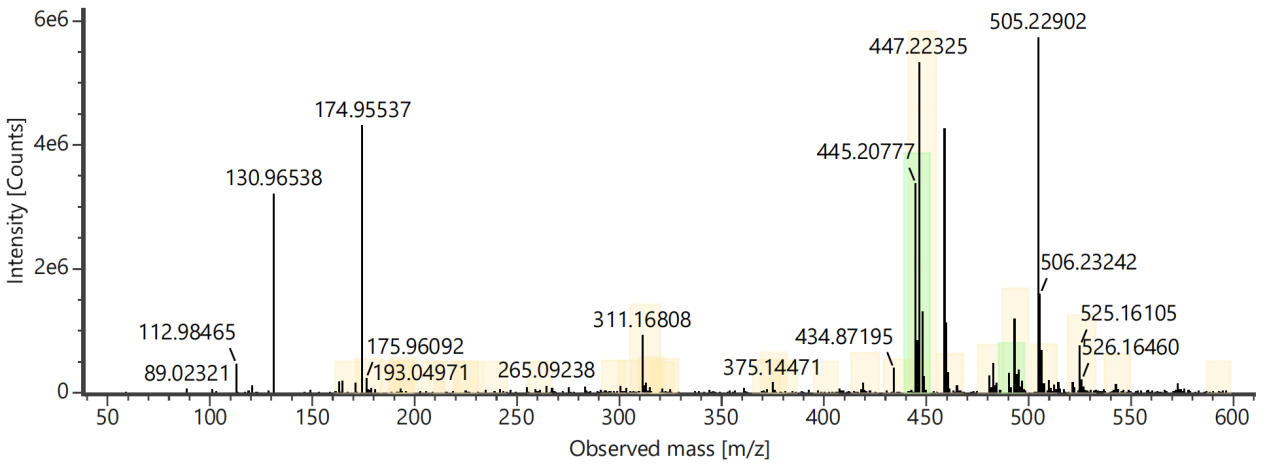


Channel name: High energy : Time 10.3524 +/- 0.0740 minutes


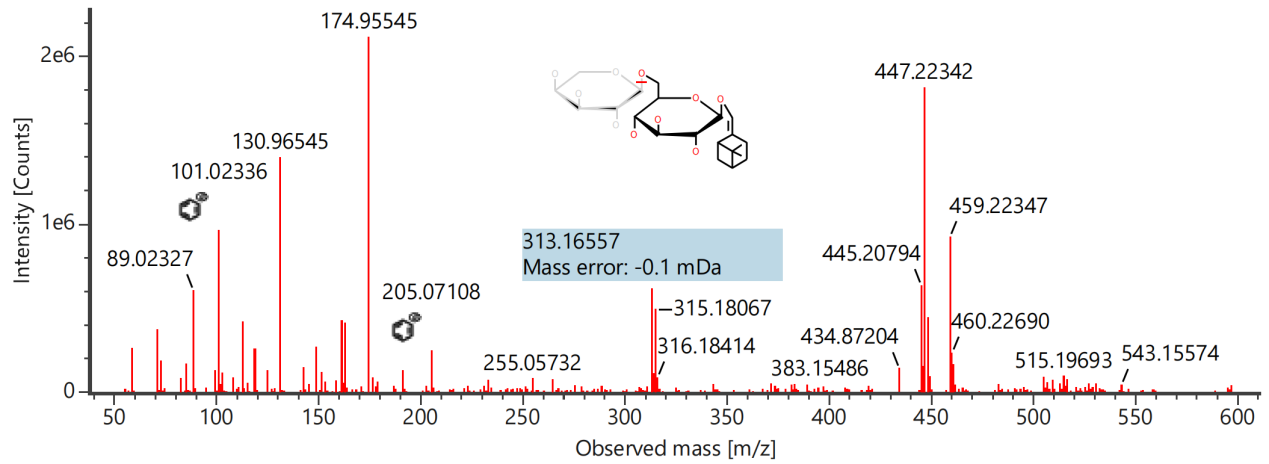


**Component name: 10-O-Acetylgeniposidic acid**

Channel name: 10-O-Acetylgeniposidic acid [+HCOO] : (10.00 mDa) 461.1300


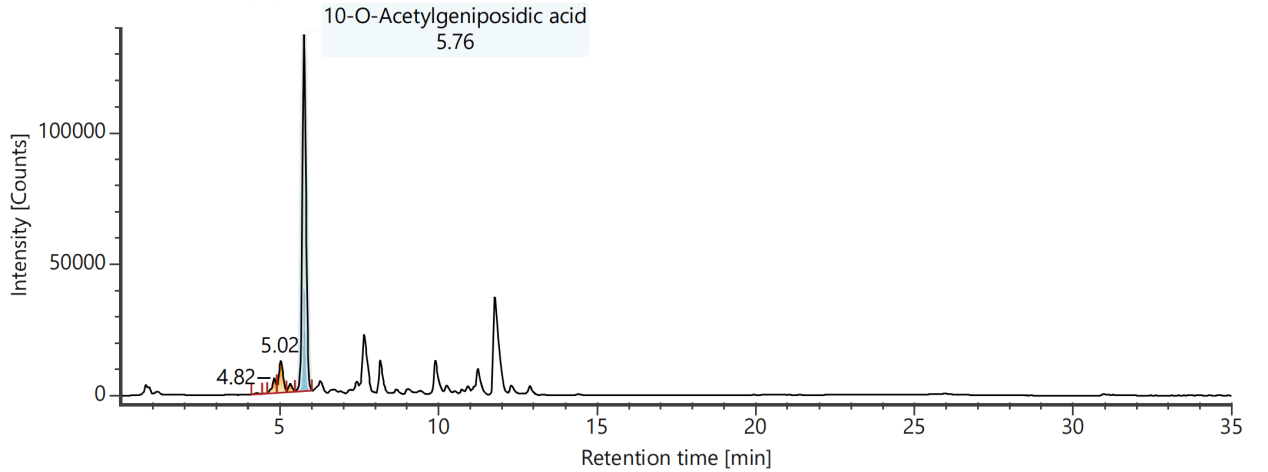


Channel name: Low energy : Time 5.7624 +/- 0.0740 minutes


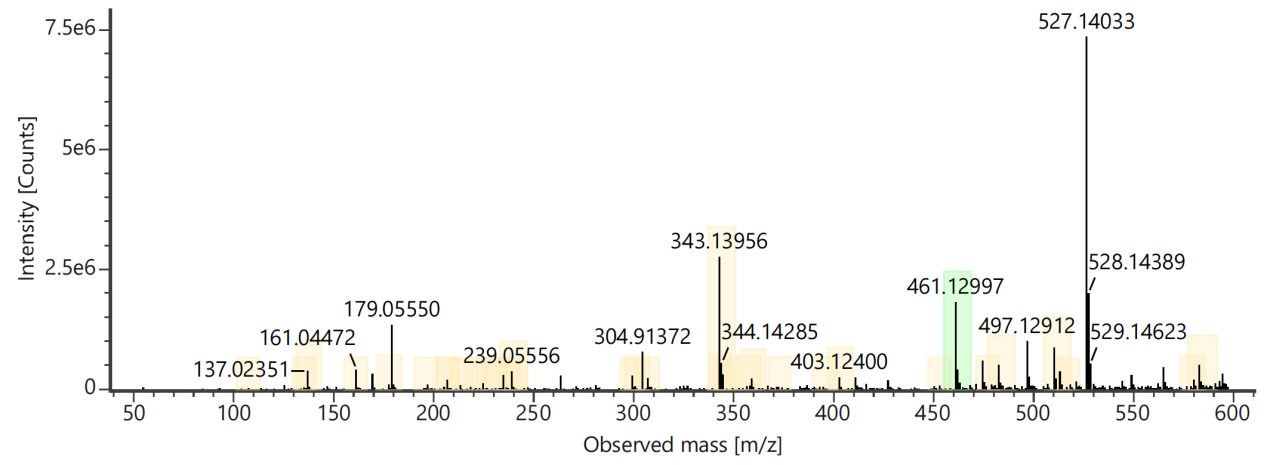


Channel name: High energy : Time 5.7624 +/- 0.0740 minutes


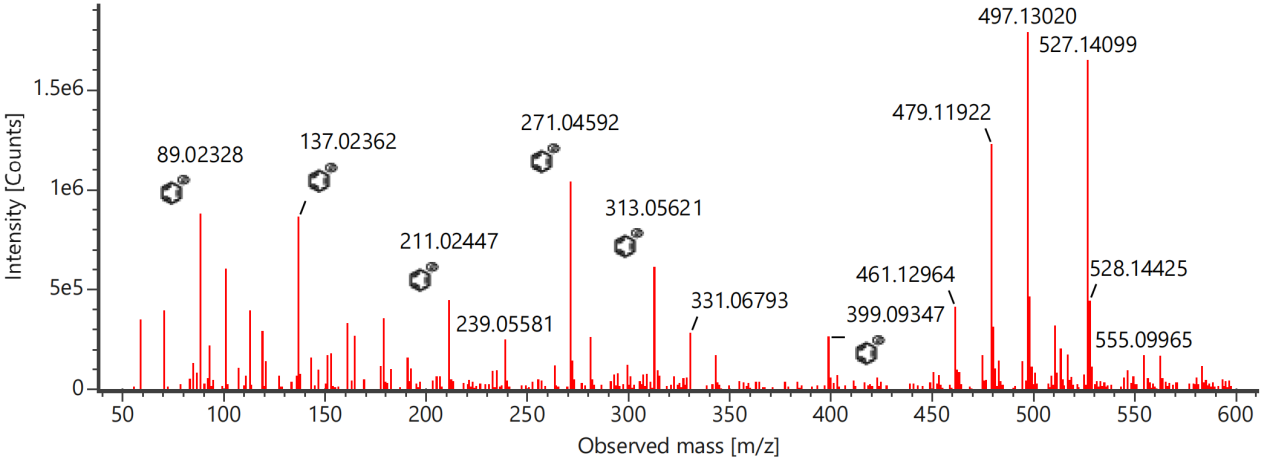


**Component name: 1-Galloyl-β-D-glucose**

Channel name: 1-Galloyl-β-D-glucose [-H] : (10.00 mDa) 331.0670


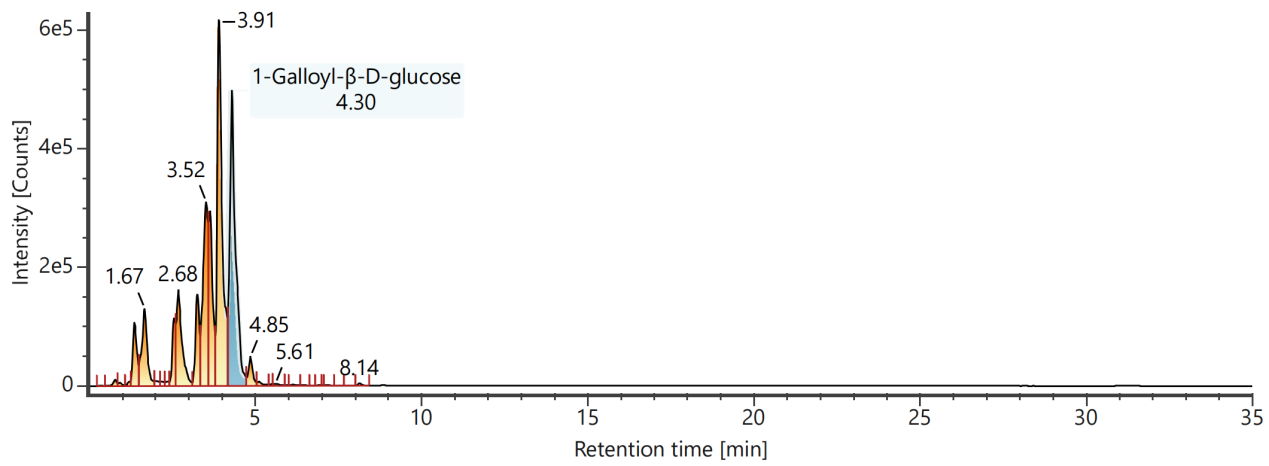


Channel name: Low energy : Time 4.3044 +/- 0.0740 minutes


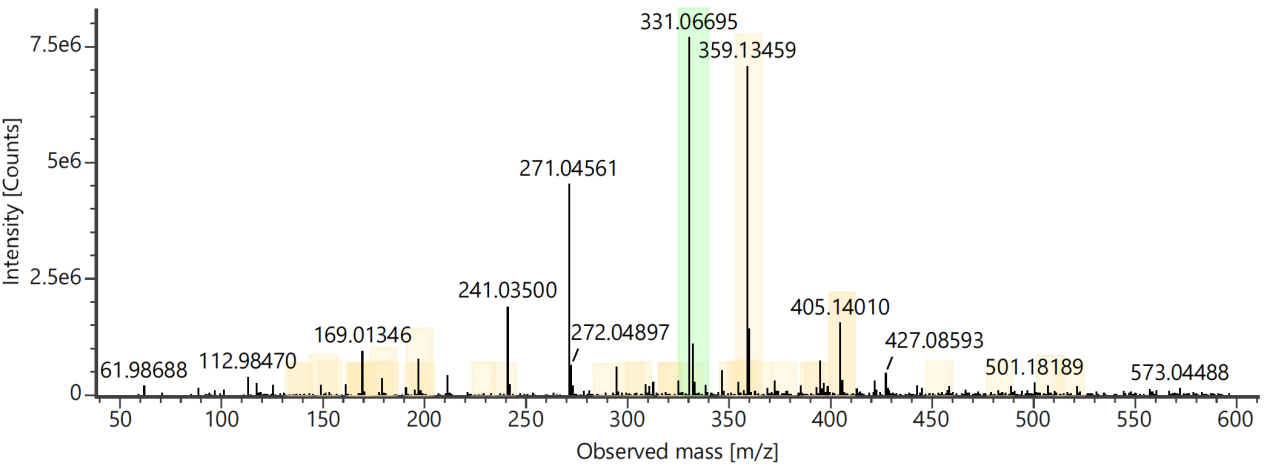


Channel name: High energy : Time 4.3044 +/- 0.0740 minutes


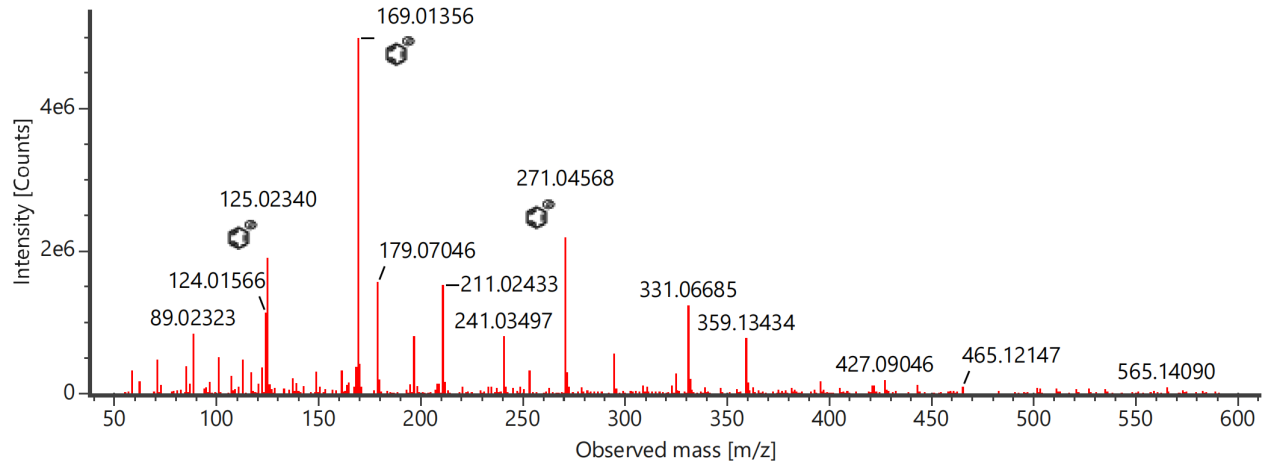


**Component name: 1-O-β-D-Glucopyranosylpaeonisuffrone**

Channel name: 1-O-β-D-Glucopyranosylpaeonisuffrone [-H] : (10.00 mDa) 359.1346


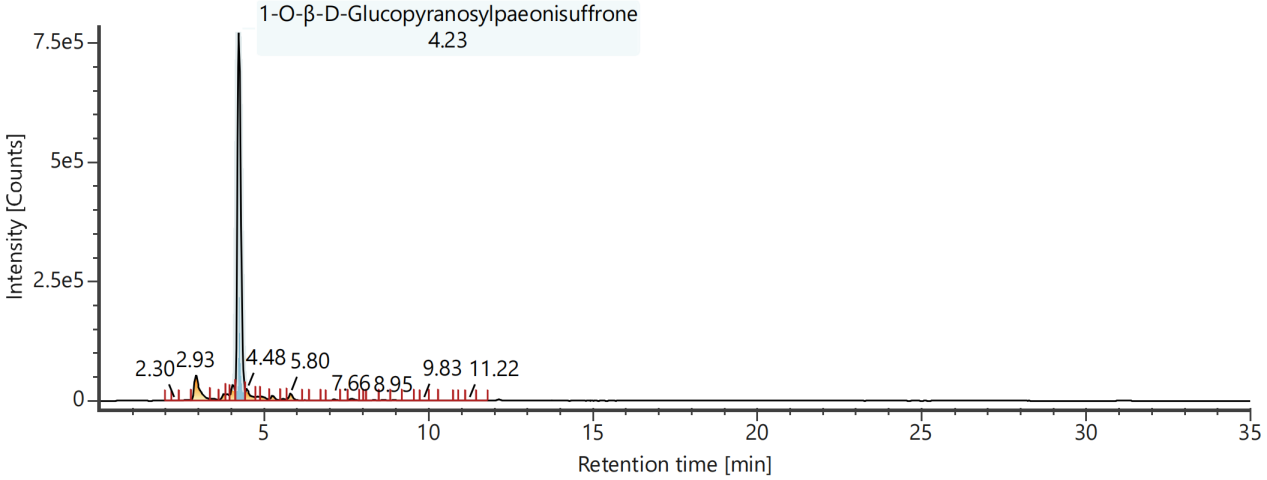


Channel name: Low energy : Time 4.2395 +/- 0.0740 minutes


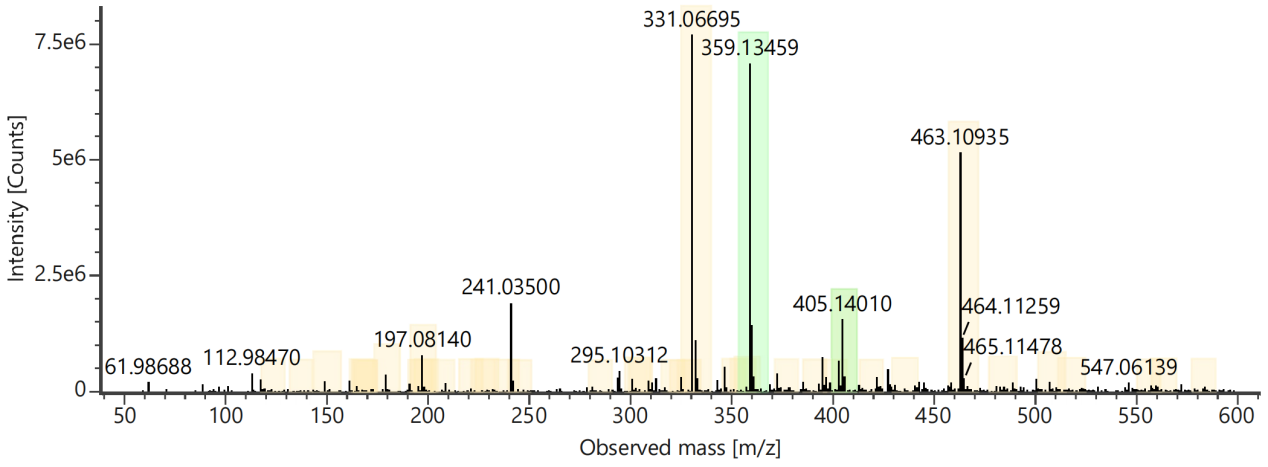


Channel name: High energy : Time 4.2395 +/- 0.0740 minutes


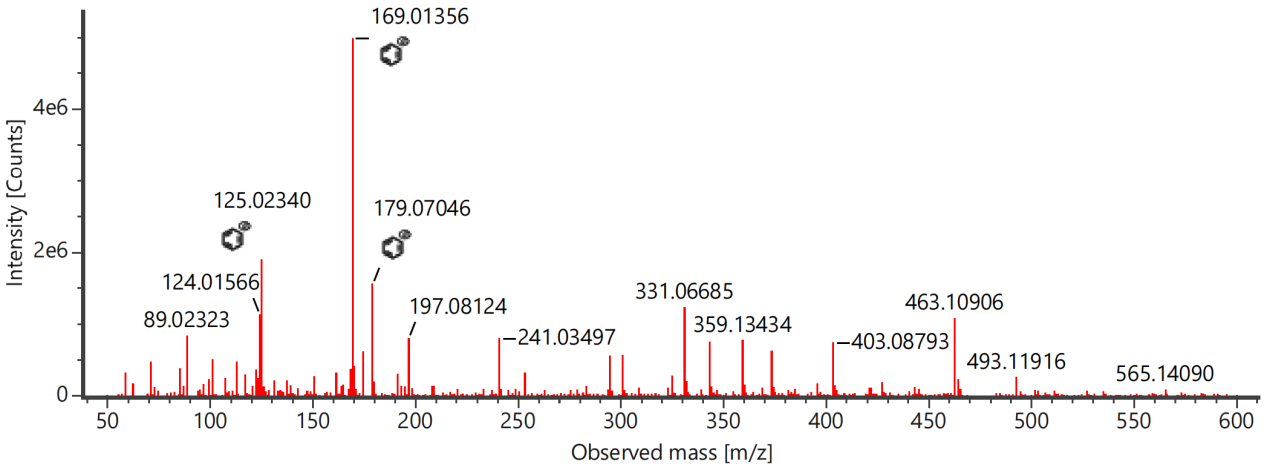


**Component name: 2,4,6-Trihydroxyacetophenone-2,4-di-O-β-D-glucopyranoside**

Channel name: 2,4,6-Trihydroxyacetophenone-2,4-di-O-β-D-glucopyranoside [-H] : (10.00 mDa) 491.1404


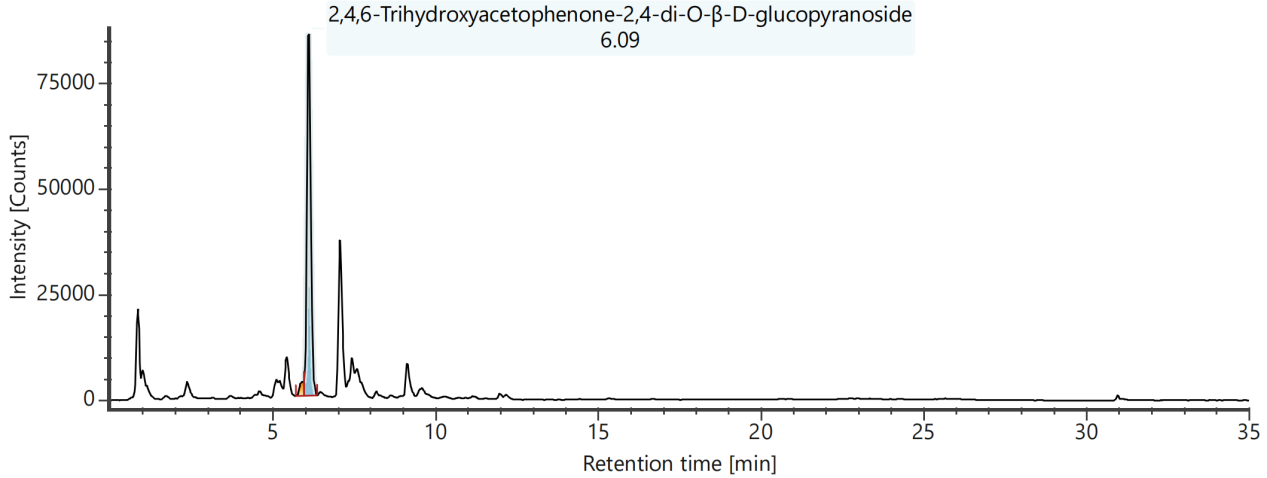


Channel name: Low energy : Time 6.0985 +/- 0.0740 minutes


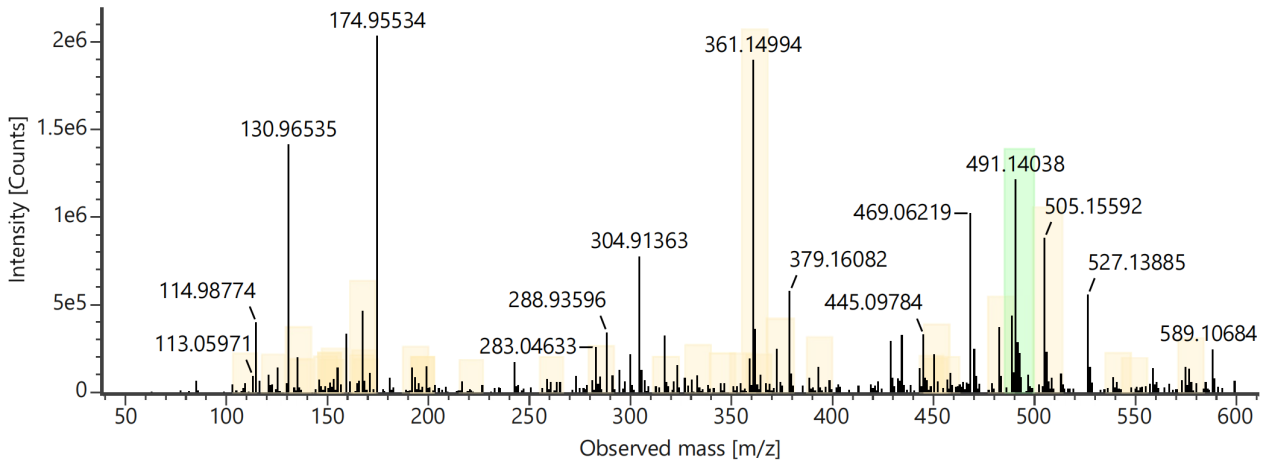


Channel name: High energy : Time 6.0985 +/- 0.0740 minutes


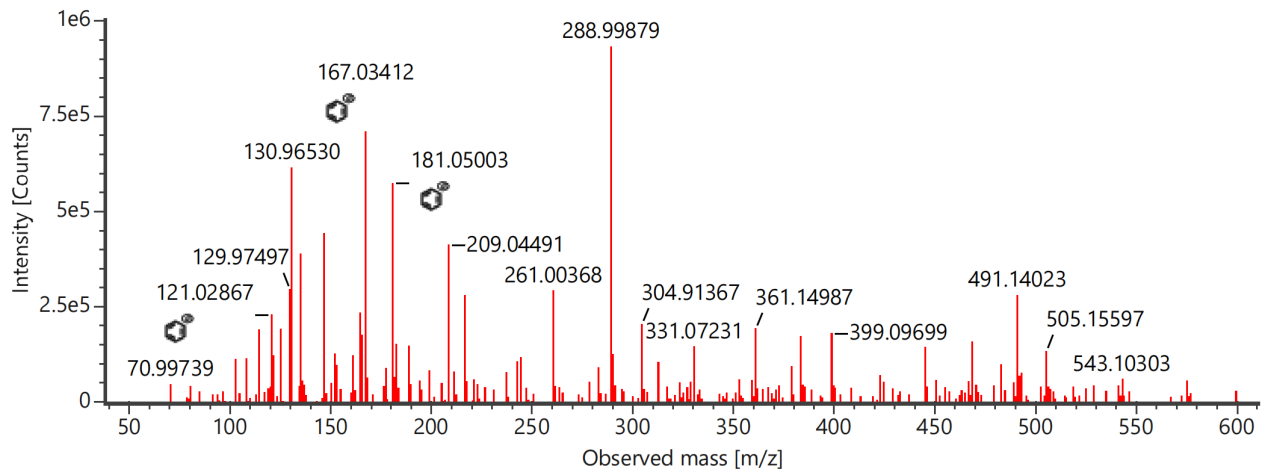


**Component name: 2′-Hydroxy-3′,4′-dimethoxy-isoflavan-7-O-β-D-glucoside**

Channel name: 2′-Hydroxy-3′,4′-dimethoxy-isoflavan-7-O-β-D-glucoside [+HCOO] : (10.00 mDa) 509.1663


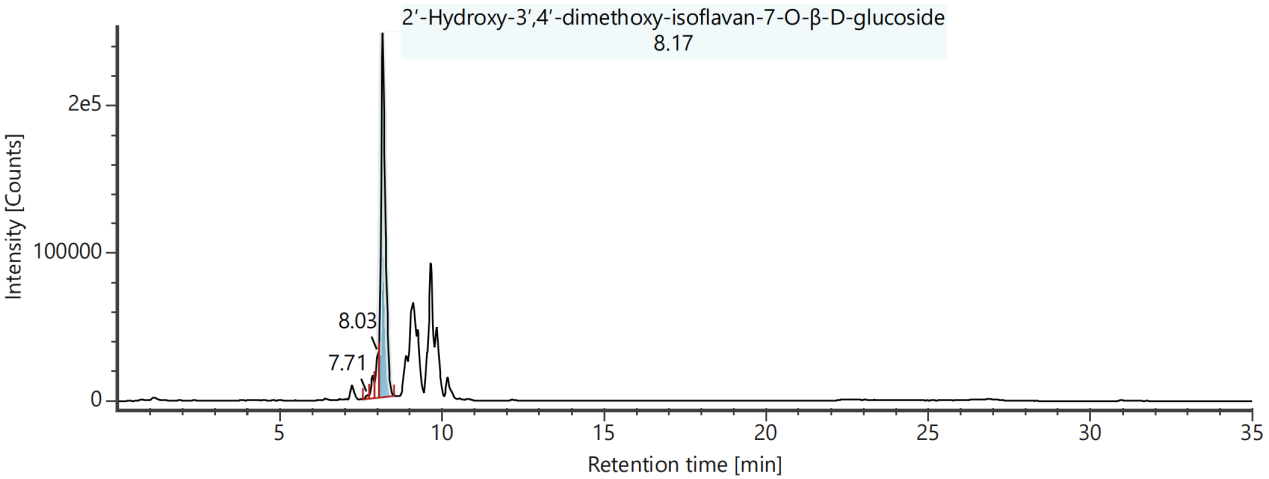


Channel name: Low energy : Time 8.1903 +/- 0.0740 minutes


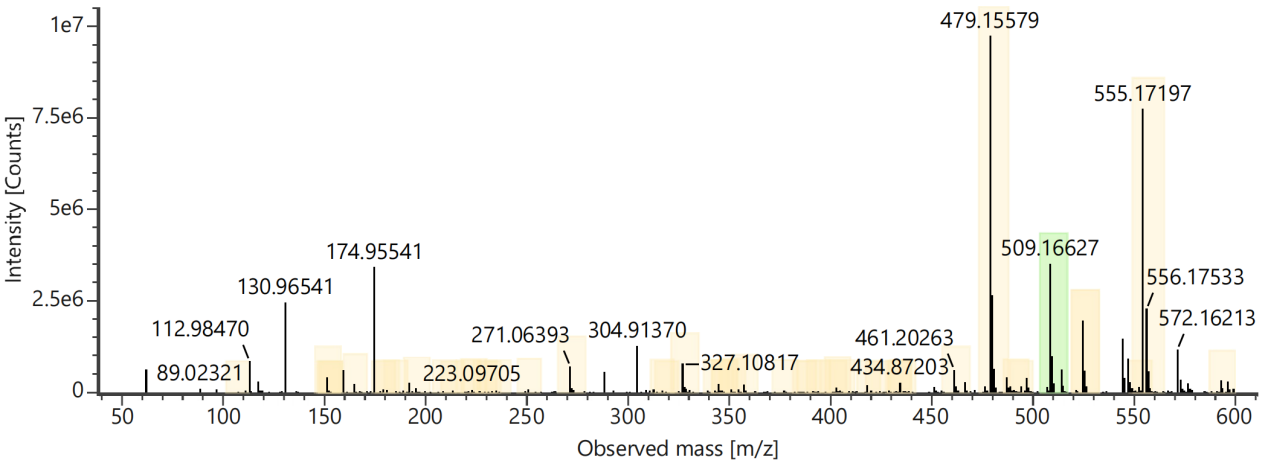


Channel name: High energy : Time 8.1903 +/- 0.0740 minutes


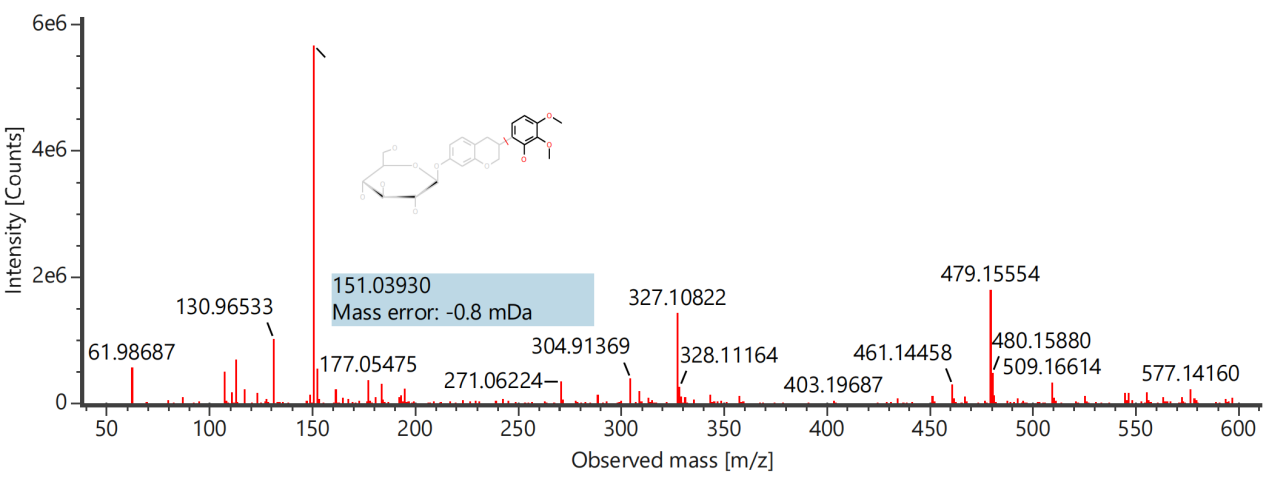


**Component name: 3,5,6,7,8,3',4'-Heptemethoxyflavone**

Channel name: 3,5,6,7,8,3',4'-Heptemethoxyflavone [-H] : (10.00 mDa) 431.1351


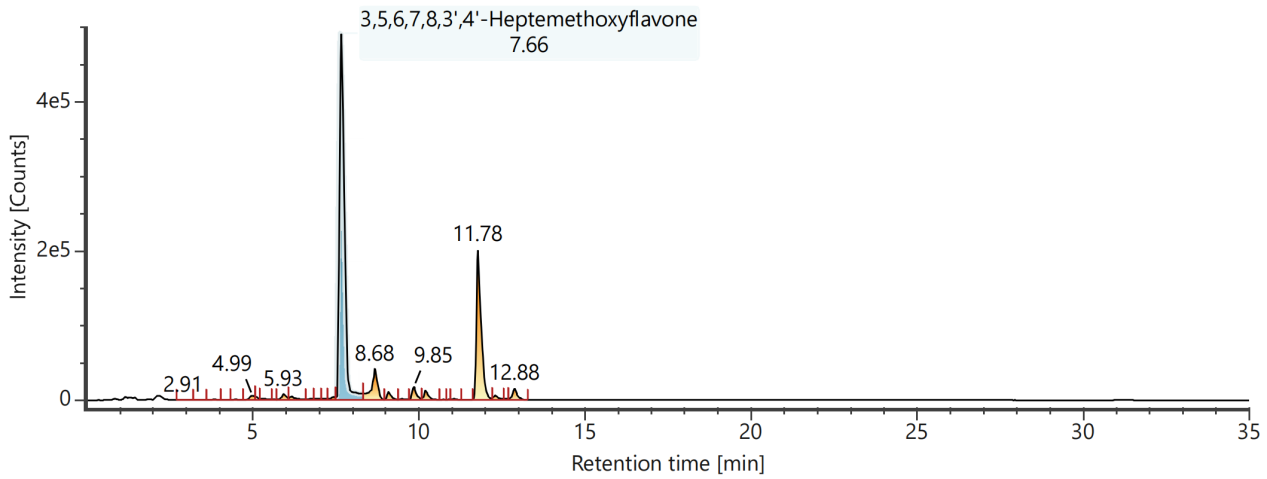


Channel name: Low energy : Time 7.6783 +/- 0.0740 minutes


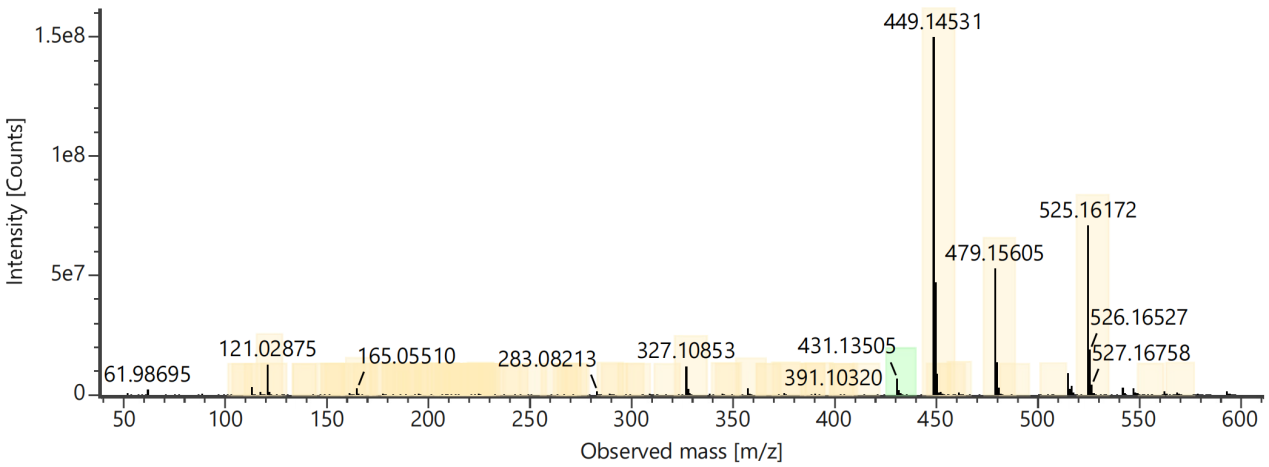


Channel name: High energy : Time 7.6783 +/- 0.0740 minutes


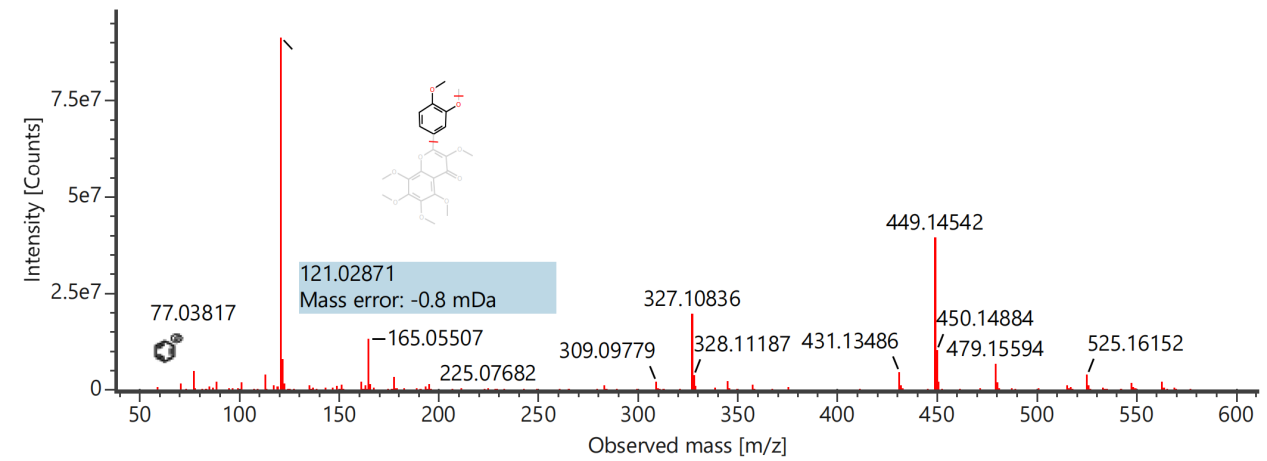


**Component name: 6-O-β-D-Glucopyranosyllactinolide**

Channel name: 6-O-β-D-Glucopyranosyllactinolide [-H] : (10.00 mDa) 361.1502


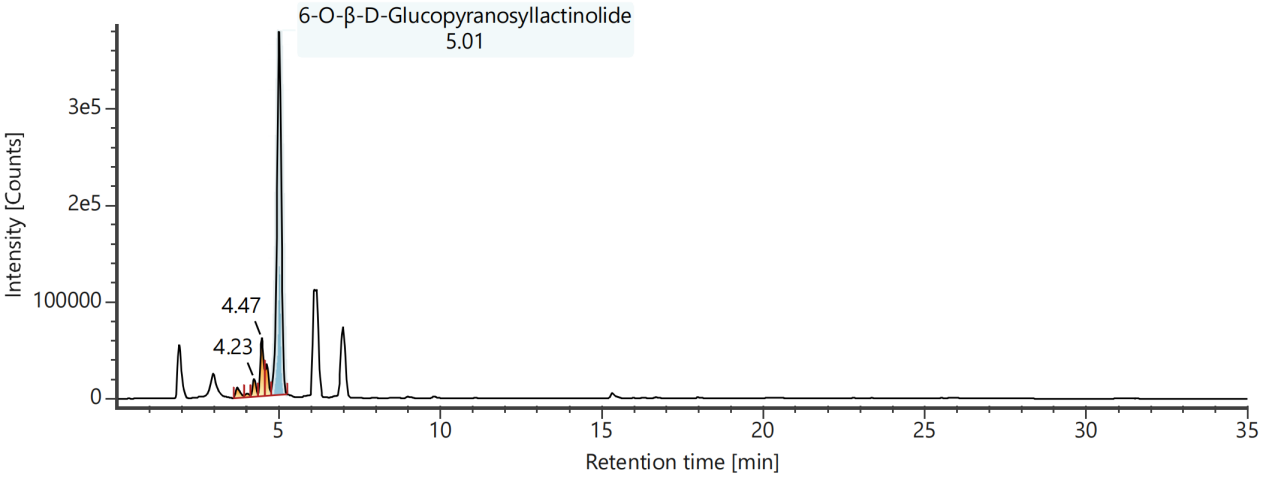


Channel name: Low energy : Time 5.0092 +/- 0.0740 minutes


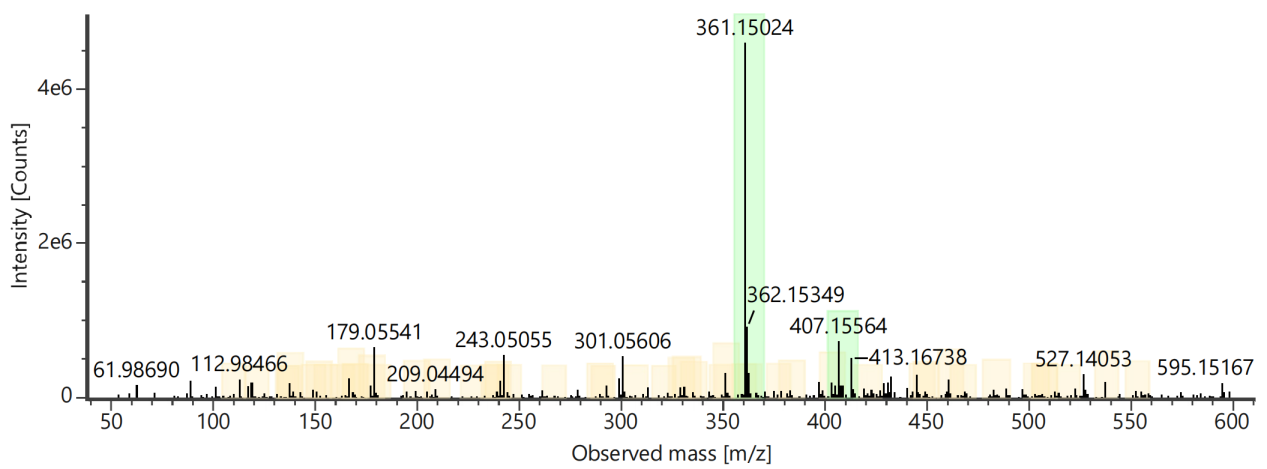


Channel name: High energy : Time 5.0092 +/- 0.0740 minutes


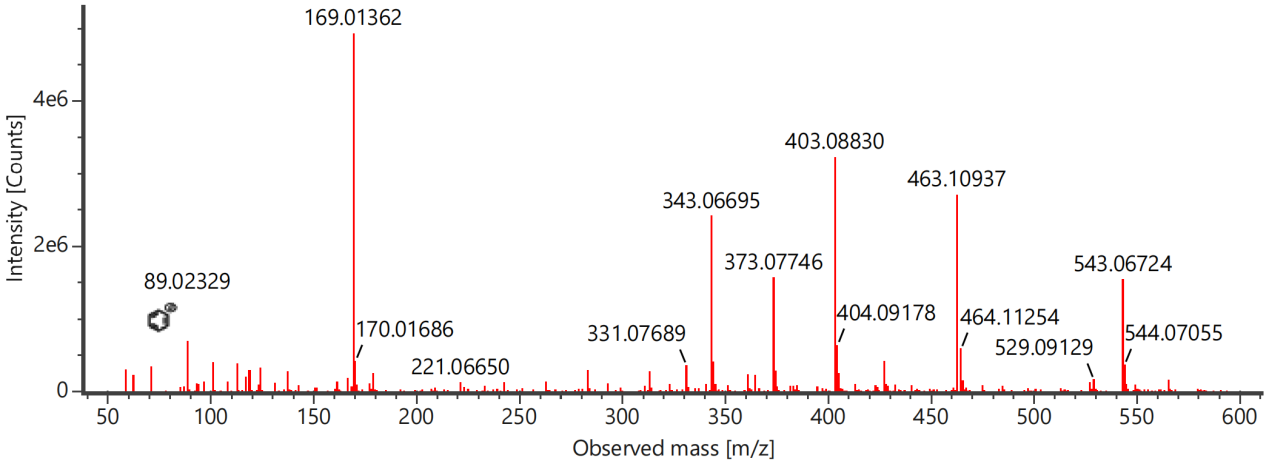


**Component name: 7,4′,7′′,4′′′-Tetra-O-amentoflavone**

Channel name: 7,4′,7′′,4′′′-Tetra-O-amentoflavone [-H] : (10.00 mDa) 593.1444


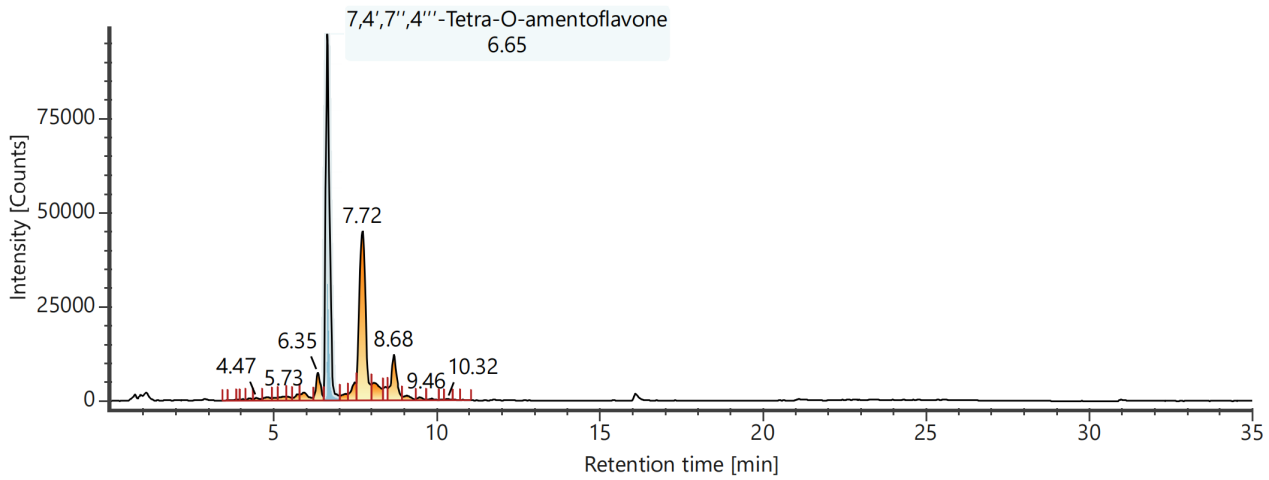


Channel name: Low energy : Time 6.6567 +/- 0.0740 minutes


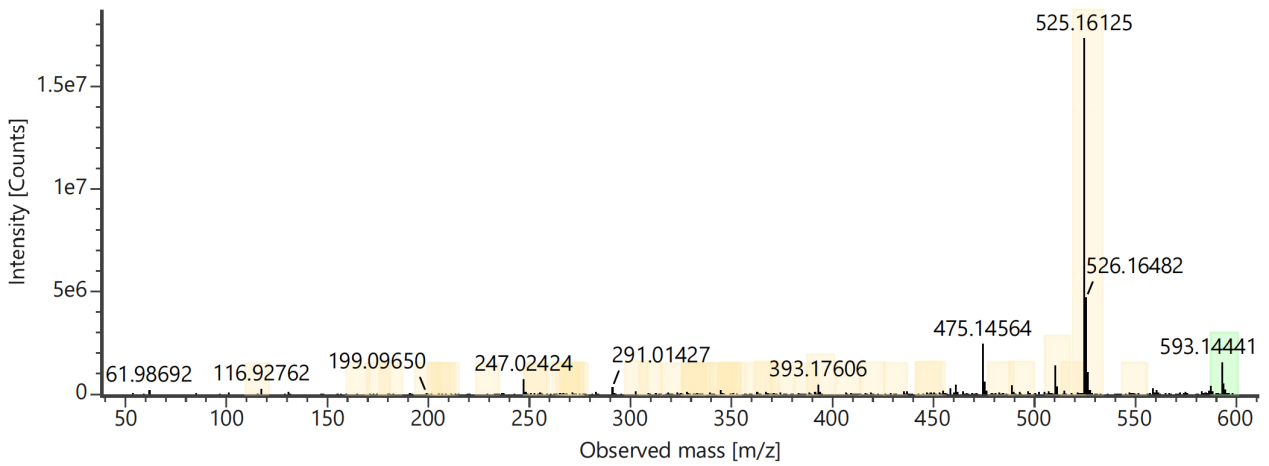


Channel name: High energy : Time 6.6567 +/- 0.0740 minutes


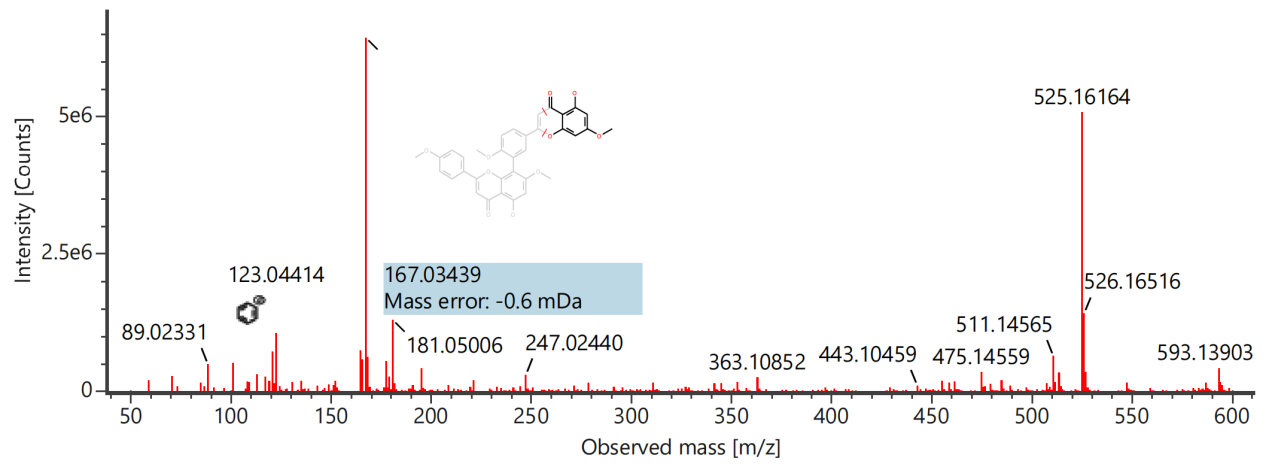


**Component name: Acetylharpagide**

Channel name: Acetylharpagide [-H] : (10.00 mDa) 405.1401


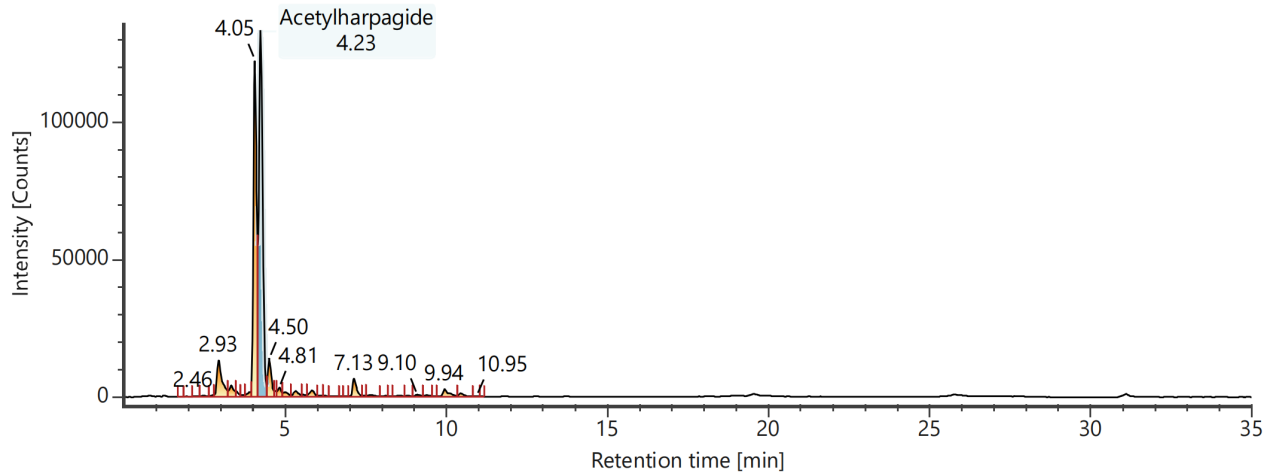


Channel name: Low energy : Time 4.2370 +/- 0.0740 minutes


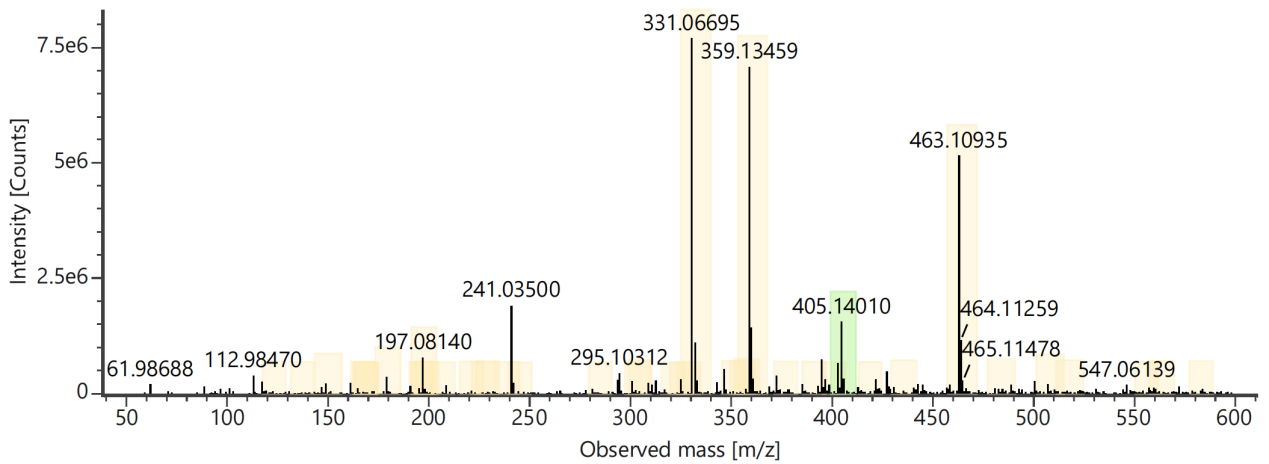


Channel name: High energy : Time 4.2370 +/- 0.0740 minutes


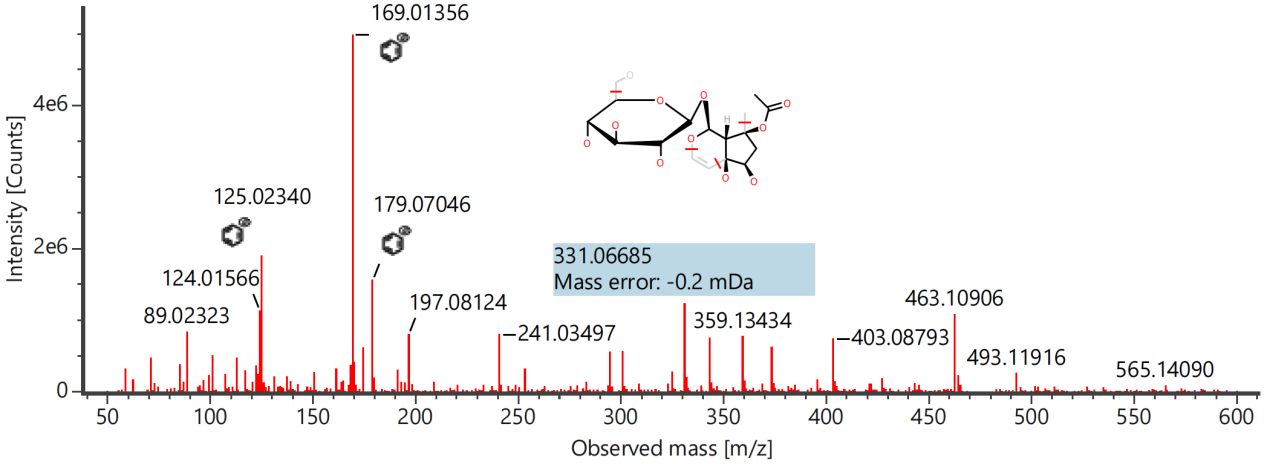


**Component name: Albiflorin**

Channel name: Albiflorin [-H] : (10.00 mDa) 479.1557


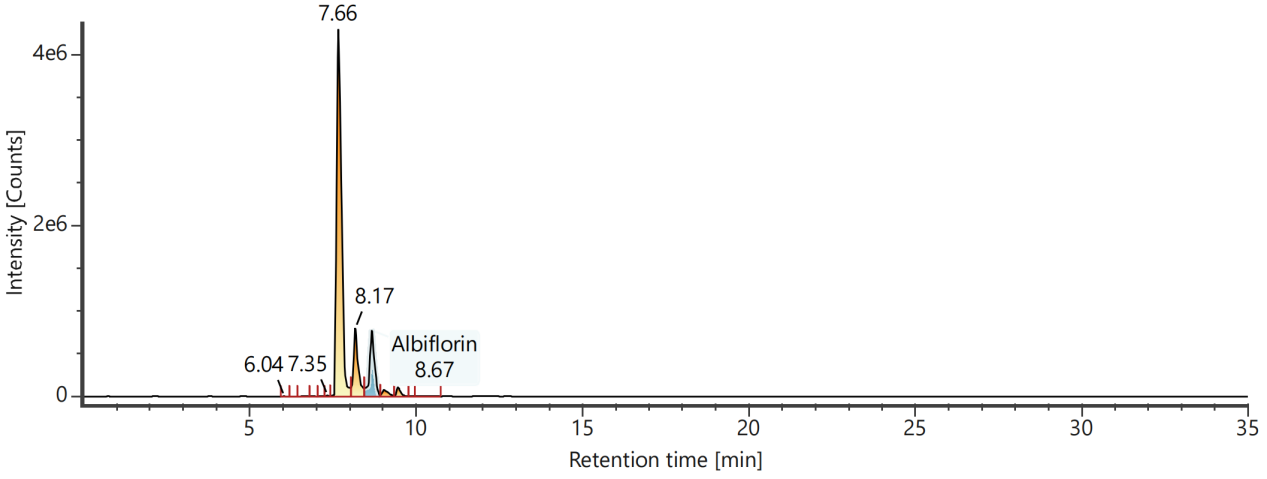


Channel name: Low energy : Time 8.6813 +/- 0.0740 minutes


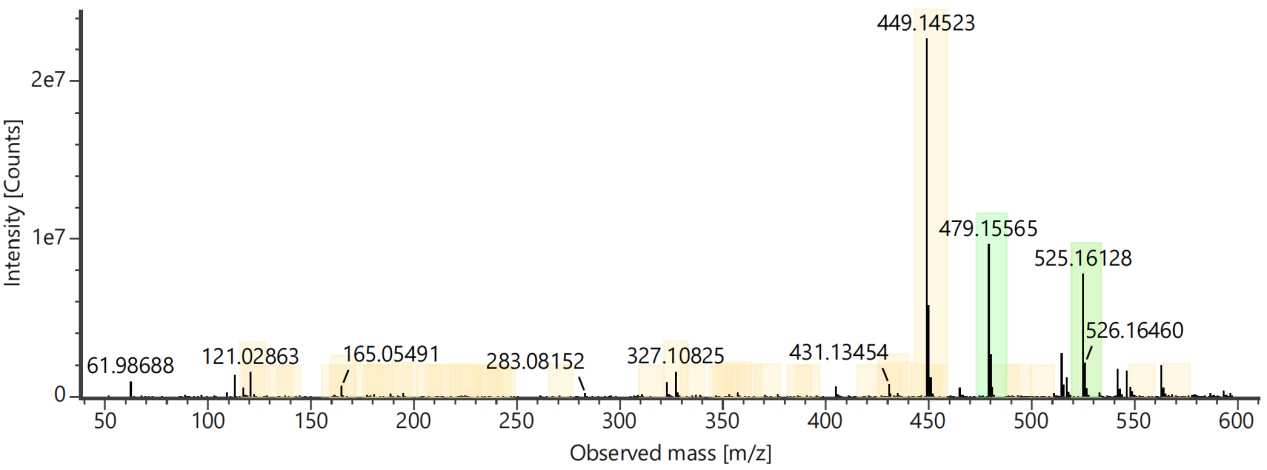


Channel name: High energy : Time 8.6813 +/- 0.0740 minutes


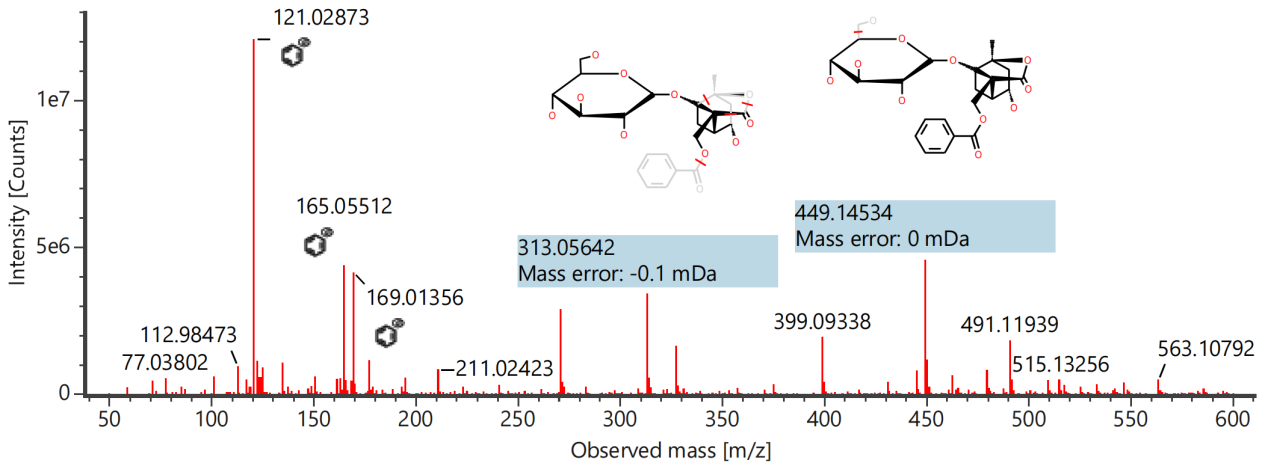


**Component name: Albiflorin R1**

Channel name: Albiflorin R1 [-H] : (10.00 mDa) 479.1558


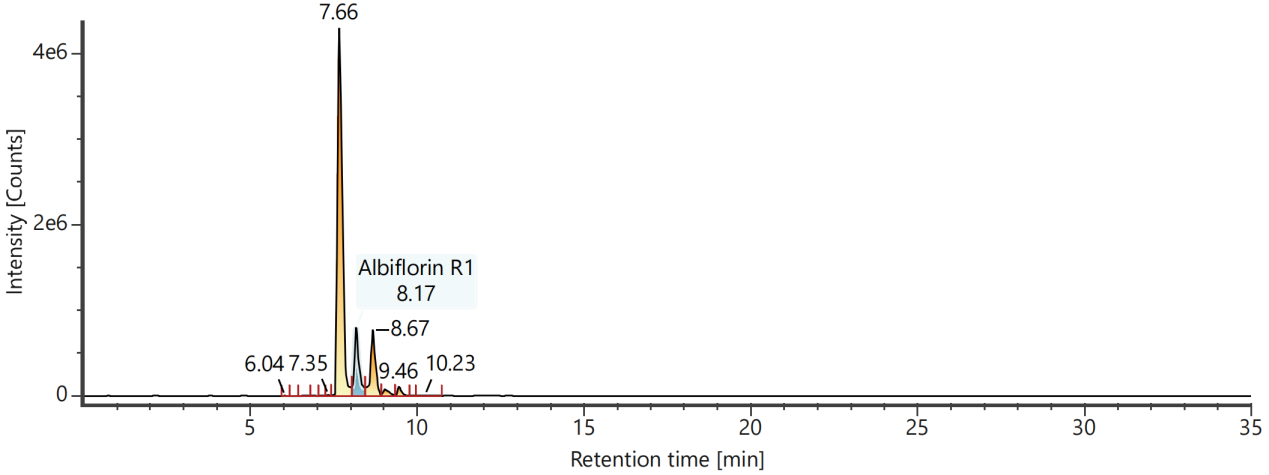


Channel name: Low energy : Time 8.1871 +/- 0.0740 minutes


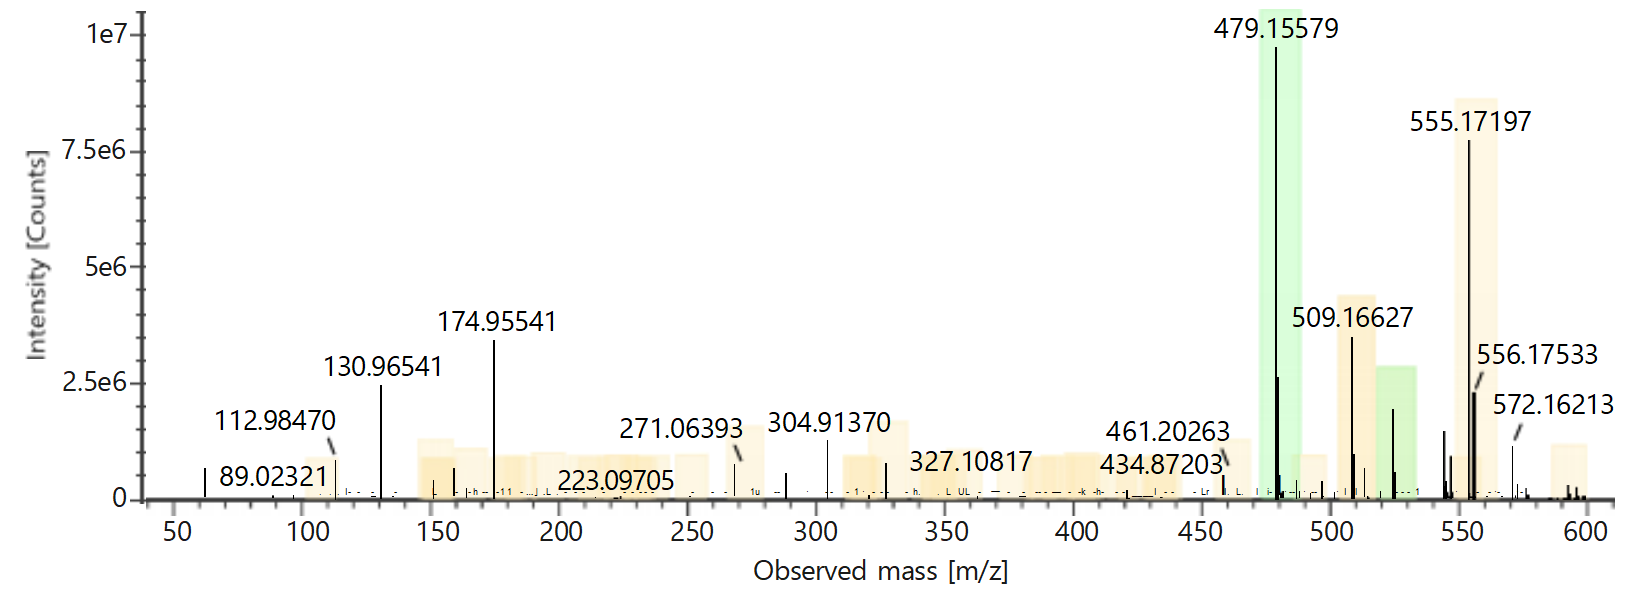


Channel name: High energy : Time 8.1871 +/- 0.0740 minutes


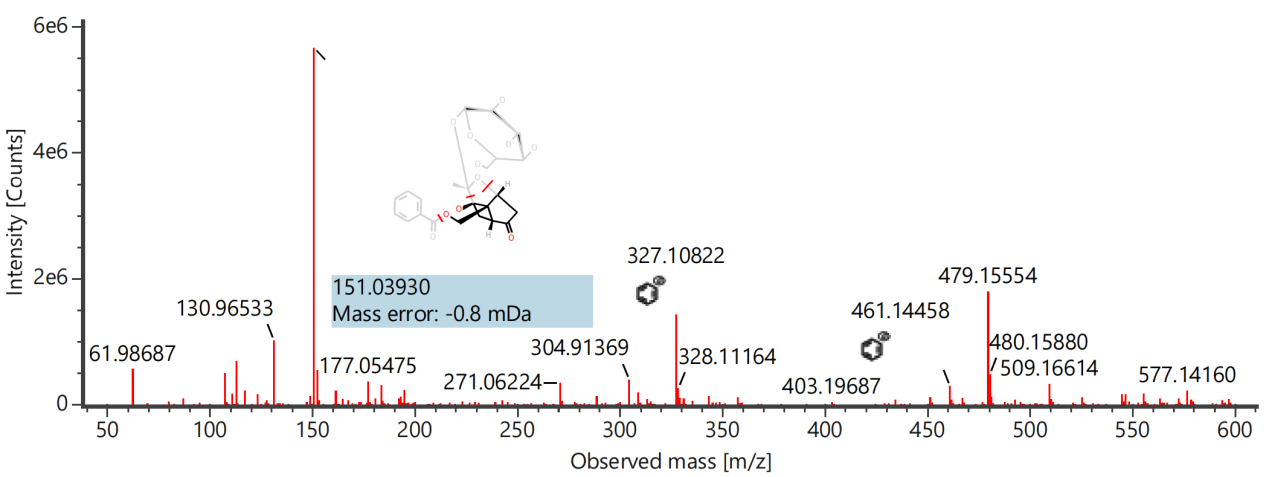


**Component name: Apiopaeonoside**

Channel name: Apiopaeonoside [-H] : (10.00 mDa) 459.1504


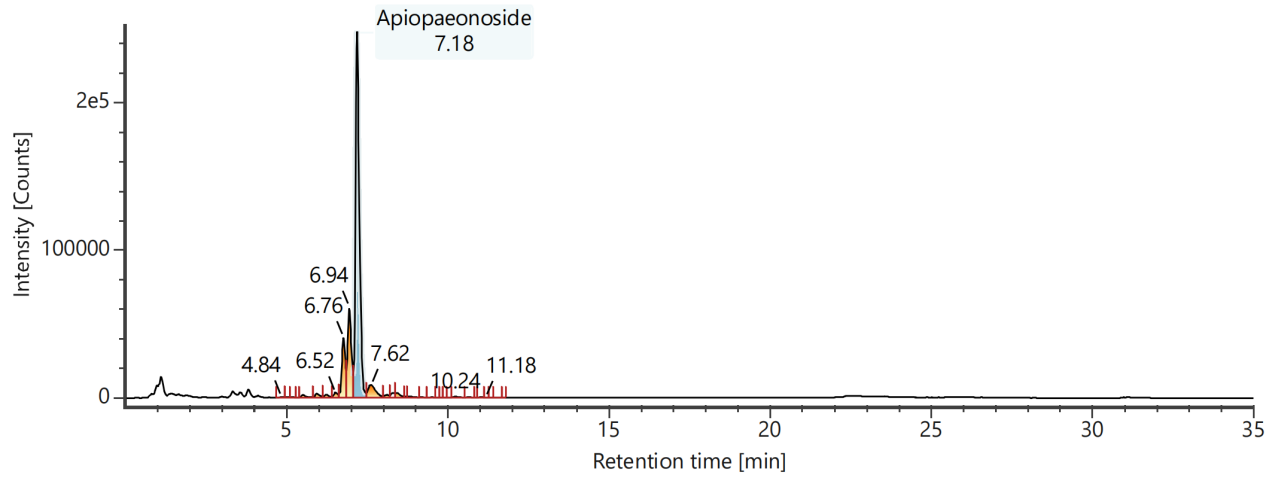


Channel name: Low energy : Time 7.1994 +/- 0.0740 minutes


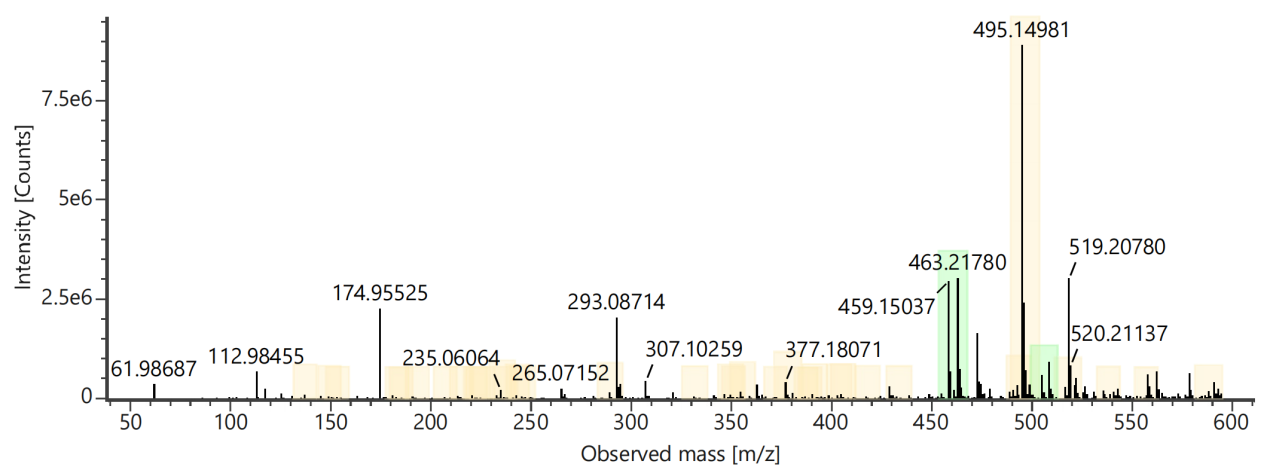


Channel name: High energy : Time 7.1994 +/- 0.0740 minutes


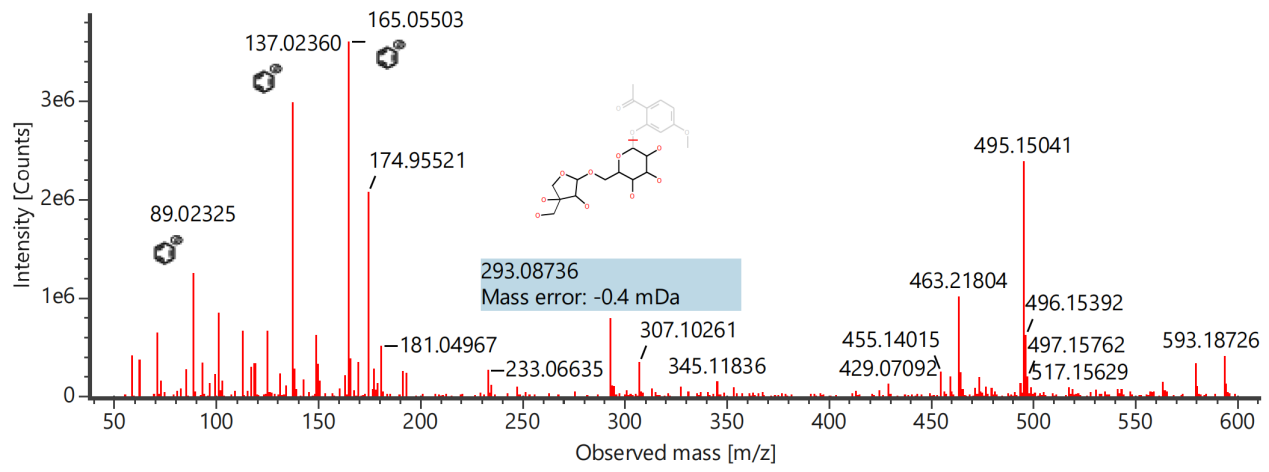


**Component name: Aucubin**

Channel name: Aucubin [-H] : (10.00 mDa) 345.1187


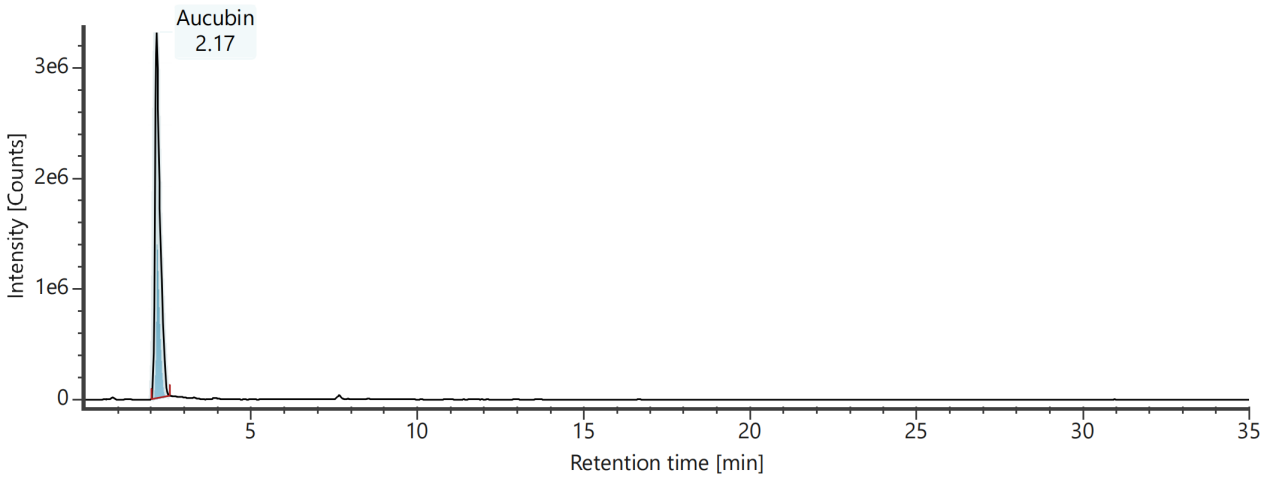


Channel name: Low energy : Time 2.1905 +/- 0.0740 minutes


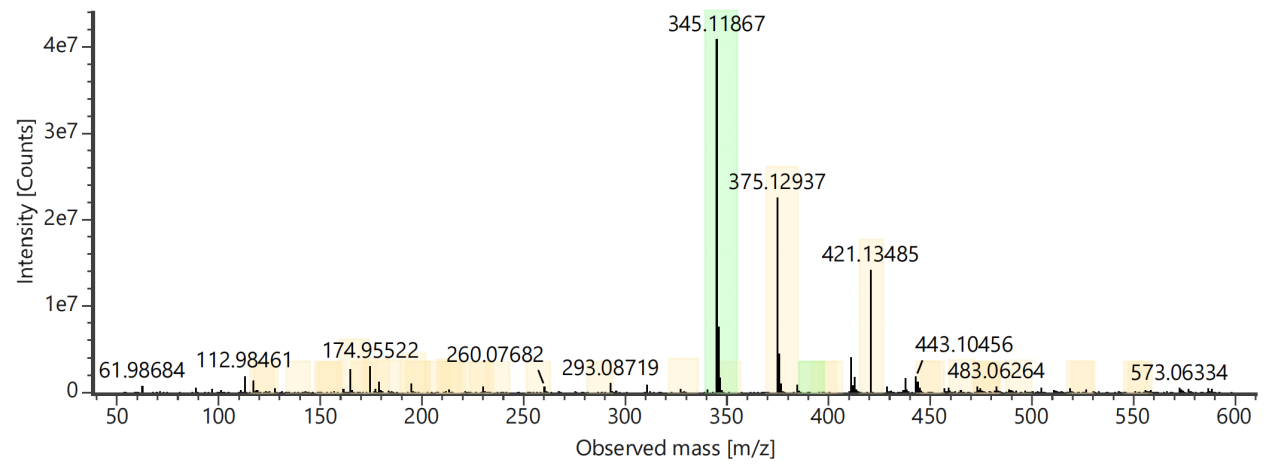


Channel name: Low energy : Time 2.1905 +/- 0.0740 minutes


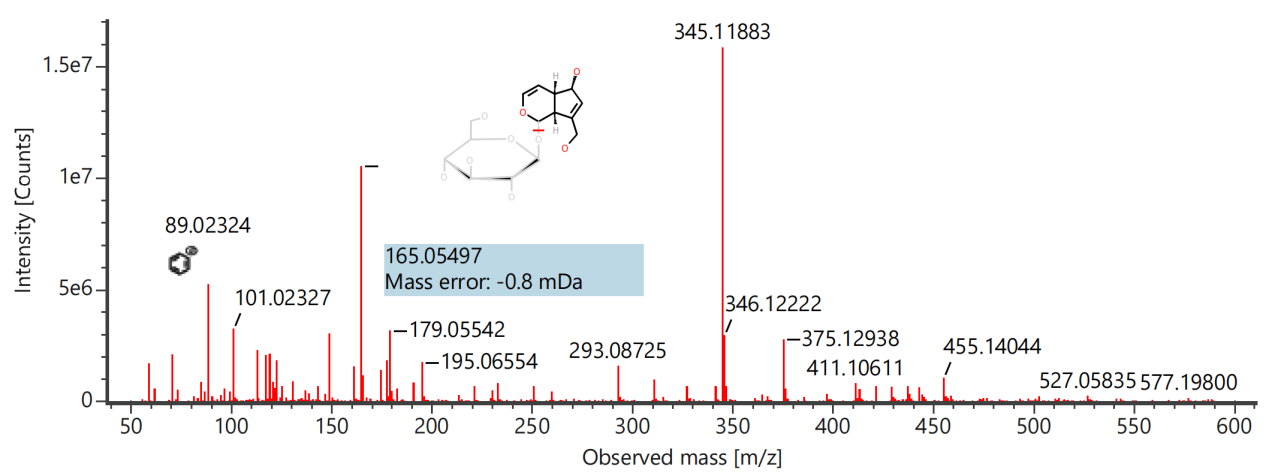


**Component name: Benzoyl-oxypaeoniflorin**

Channel name: Benzoyl-oxypaeoniflorin [-H] : (10.00 mDa) 599.1778


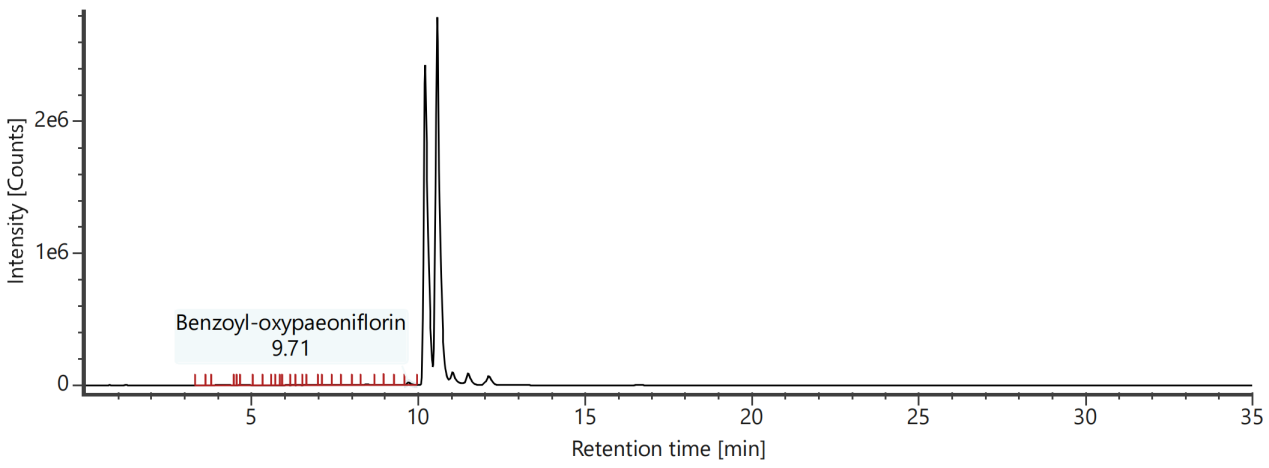


Channel name: Low energy : Time 9.7261 +/- 0.0740 minutes


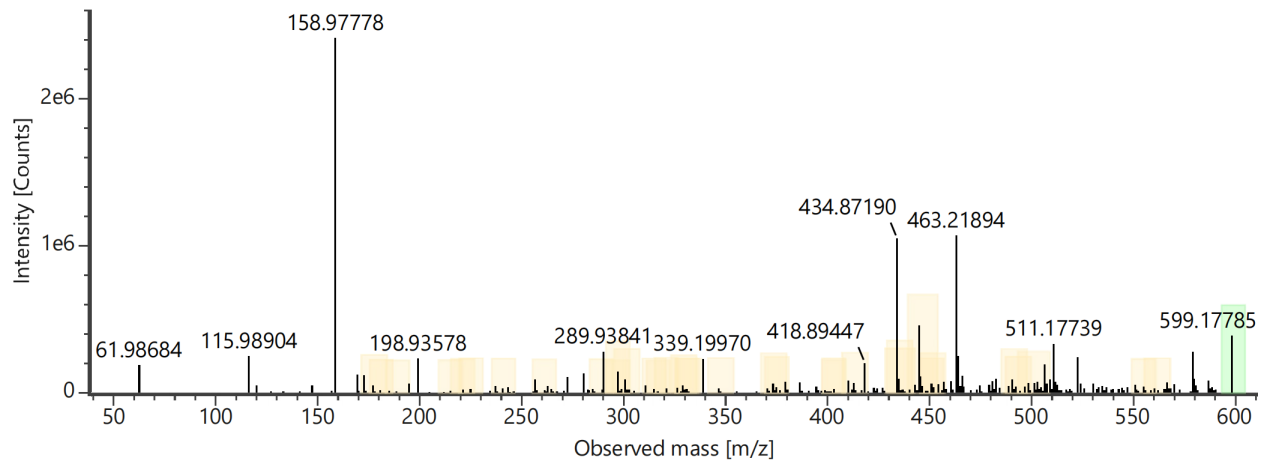


Channel name: High energy : Time 9.7261 +/- 0.0740 minutes


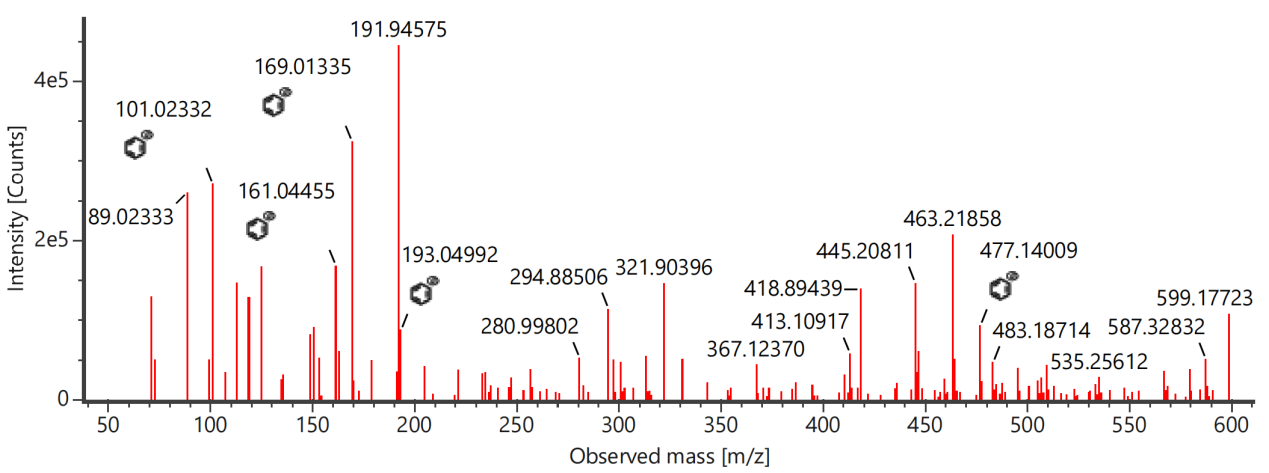


**Component name: Benzoylpaeoniflorin**

Channel name: Benzoylpaeoniflorin [-H] : (10.00 mDa) 583.1822


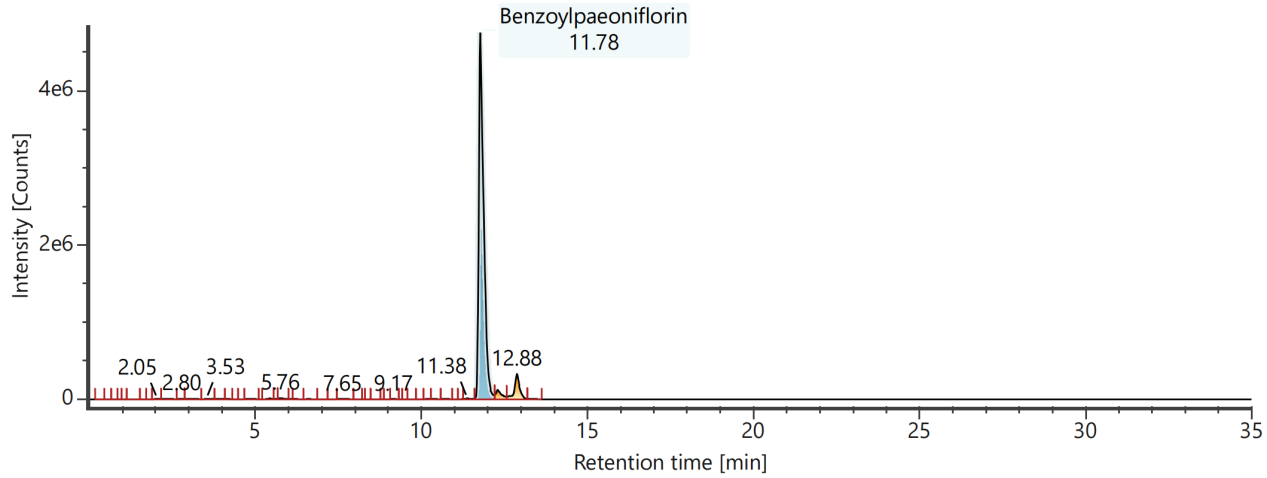


Channel name: Low energy : Time 11.7986 +/- 0.0740 minutes


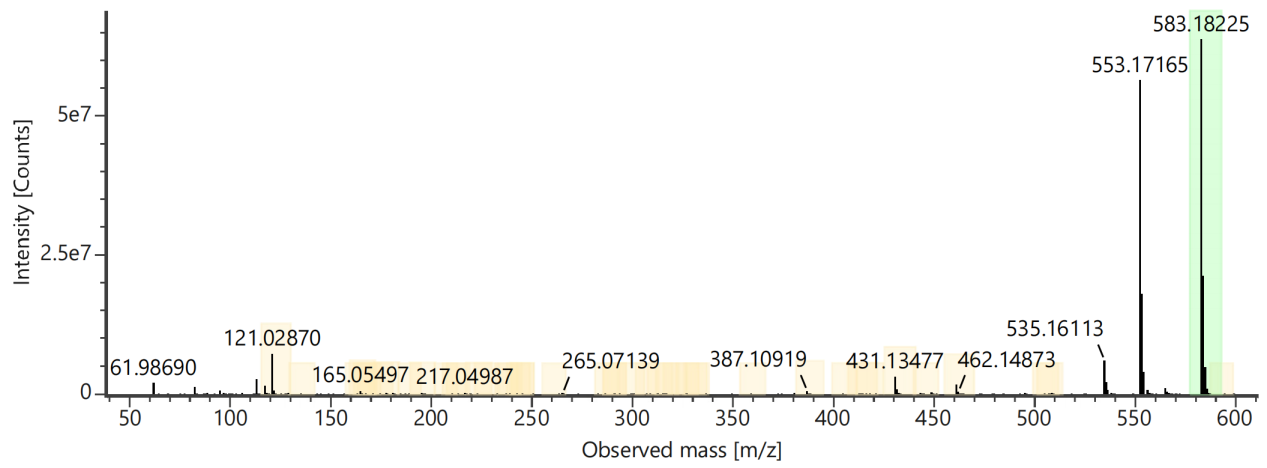


Channel name: High energy : Time 11.7986 +/- 0.0740 minutes


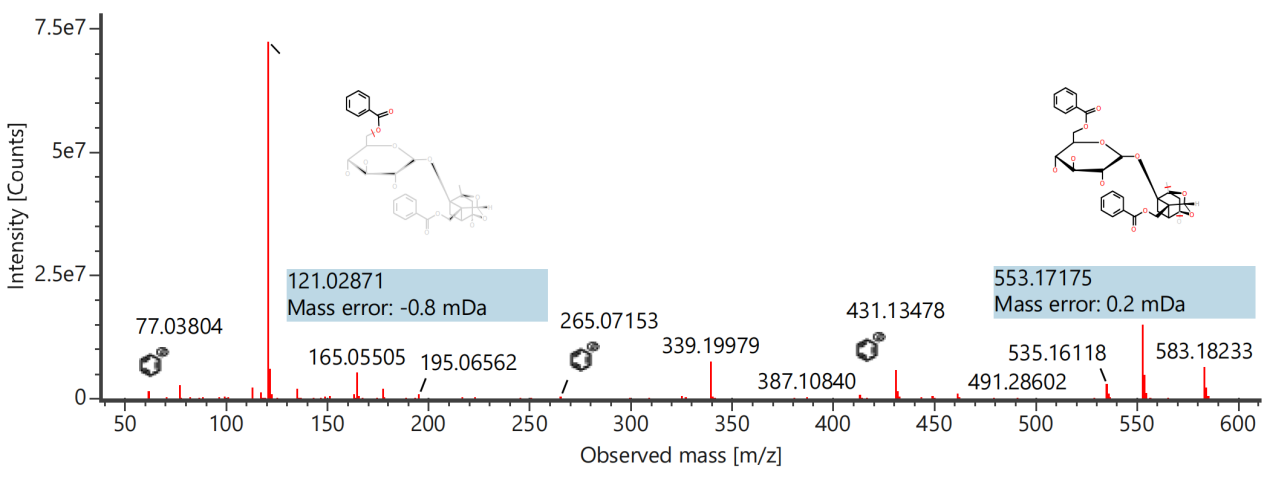


**Component name: beta-D-Apiose**

Channel name: beta-D-Apiose [+HCOO] : (10.00 mDa) 195.0504


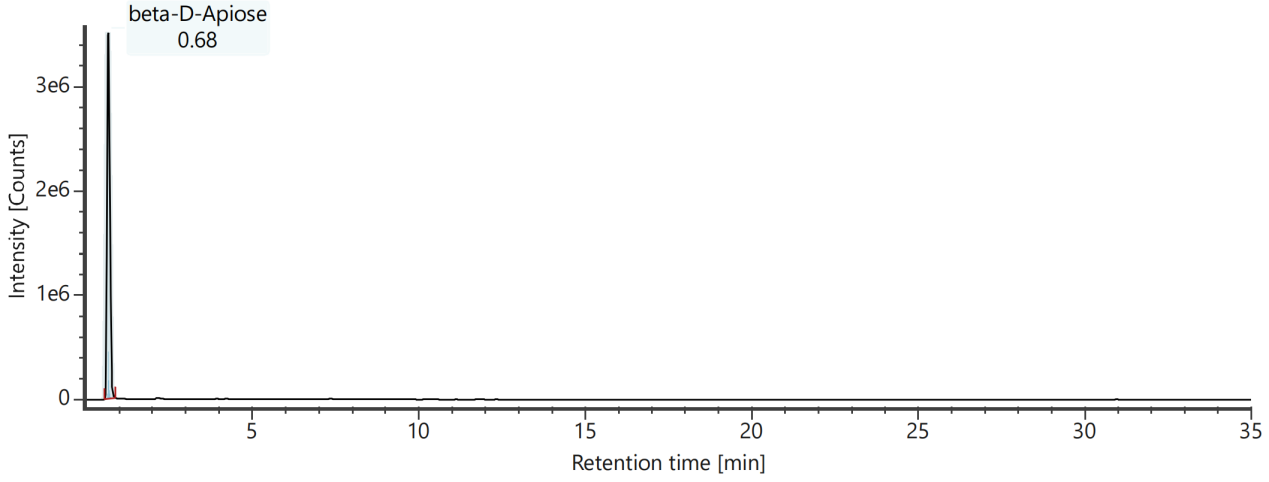


Channel name: Low energy : Time 0.6889 +/- 0.0740 minutes


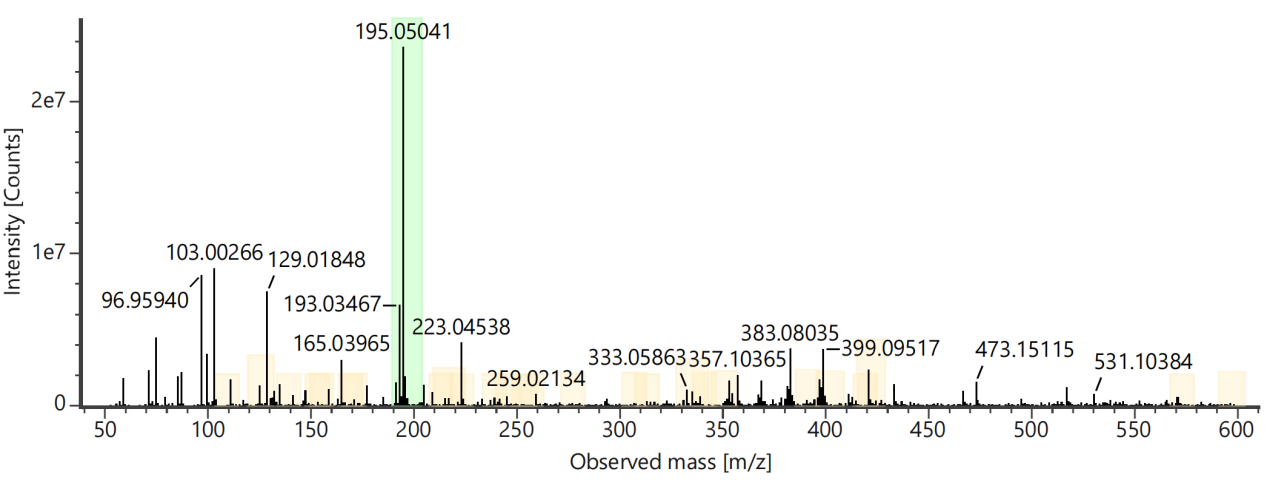


Channel name: High energy : Time 0.6889 +/- 0.0740 minutes


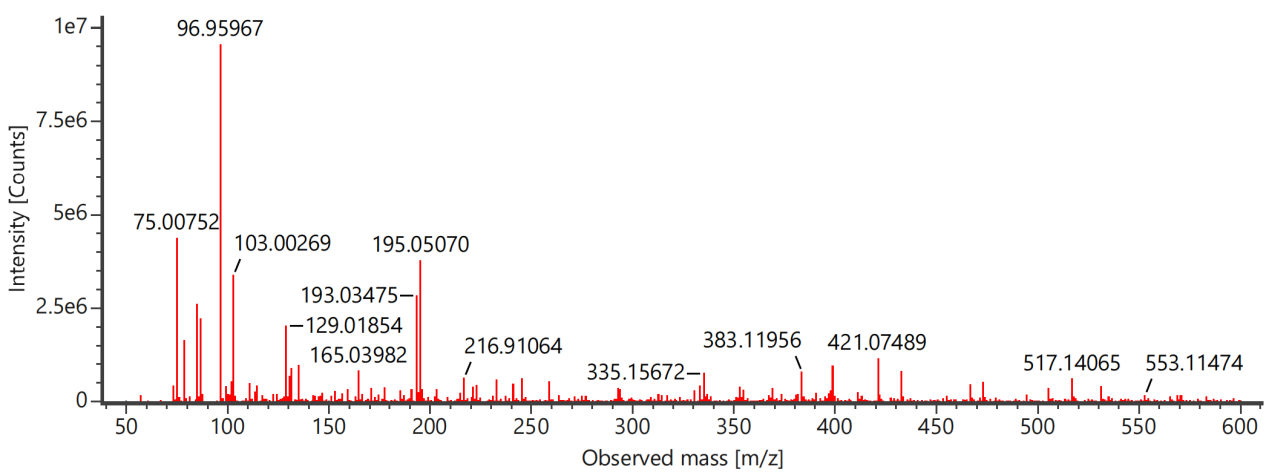


**Component name: Blestrianol D**

Channel name: Blestrianol D [+HCOO] : (10.00 mDa) 497.1626


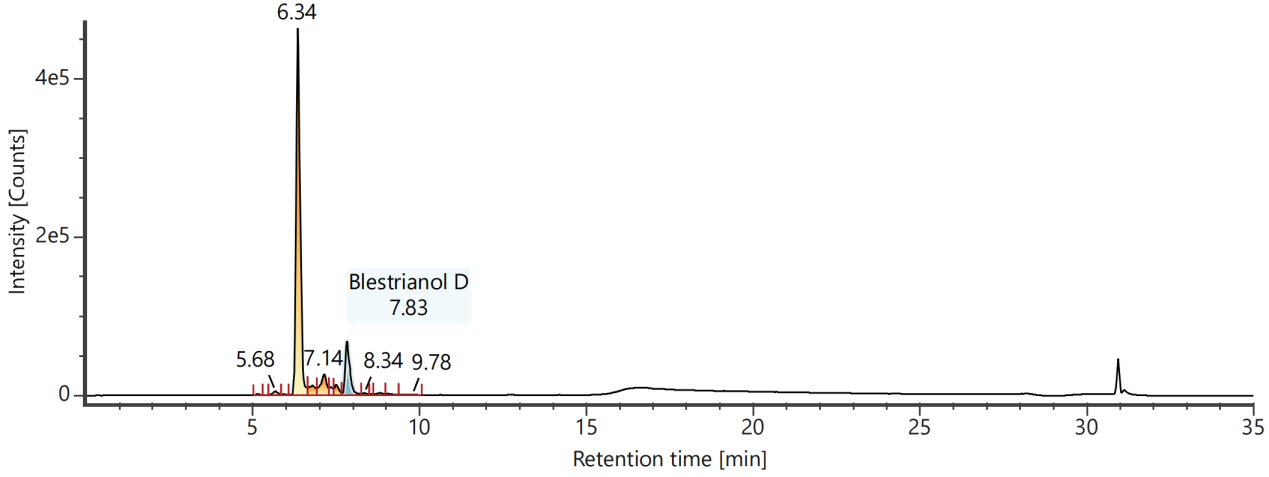


Channel name: Low energy : Time 7.8409 +/- 0.0740 minutes


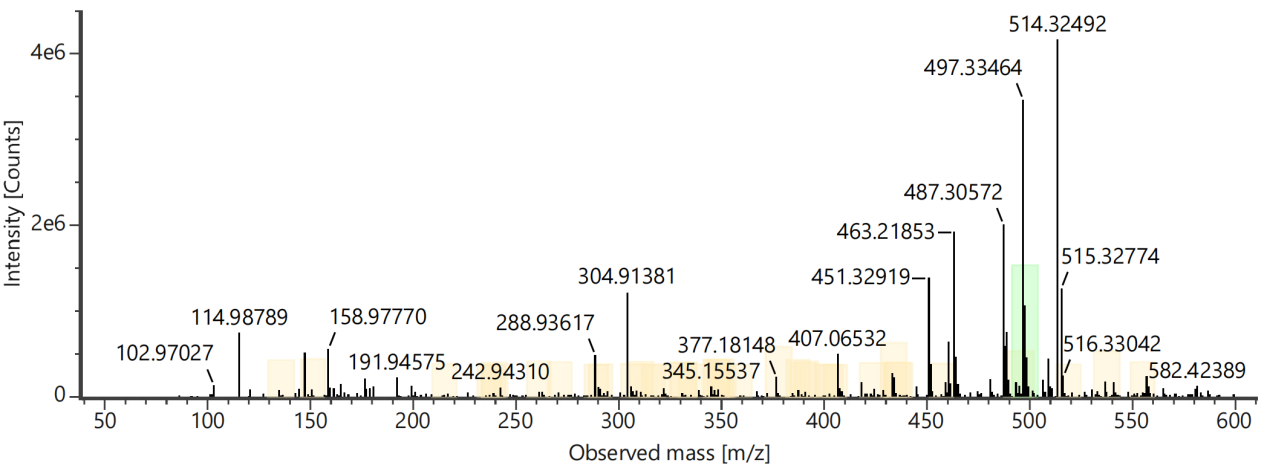


Channel name: High energy : Time 7.8409 +/- 0.0740 minutes


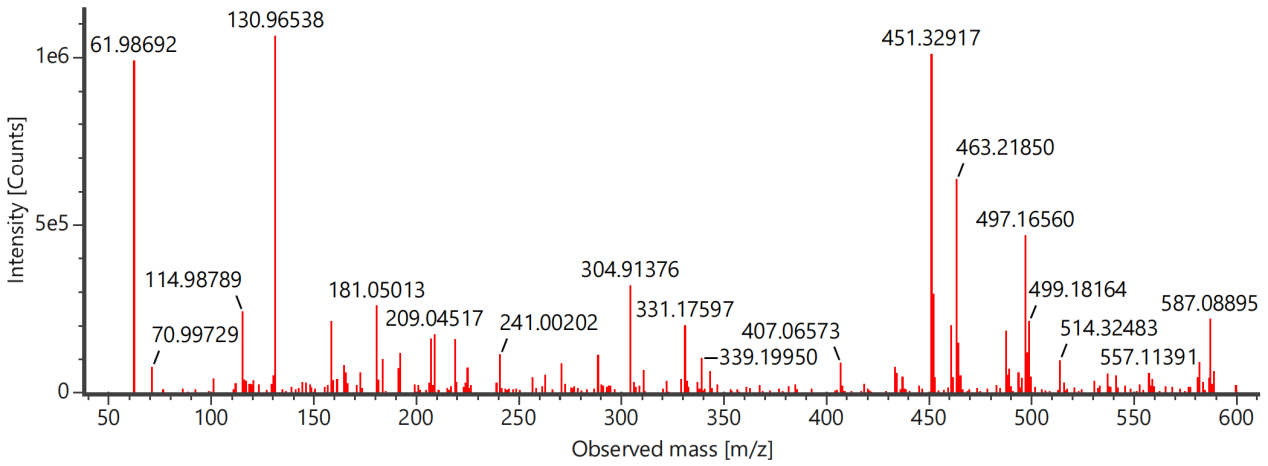


**Component name: Ciwujiatone**

Channel name: Ciwujiatone [+HCOO] : (10.00 mDa) 479.1561


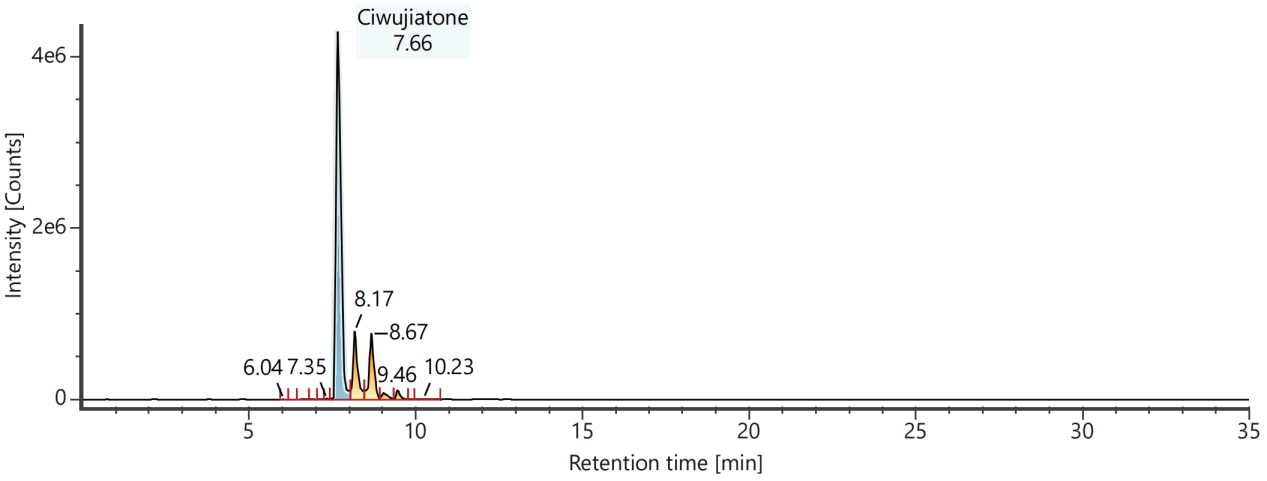


Channel name: Low energy : Time 7.6809 +/- 0.0740 minutes


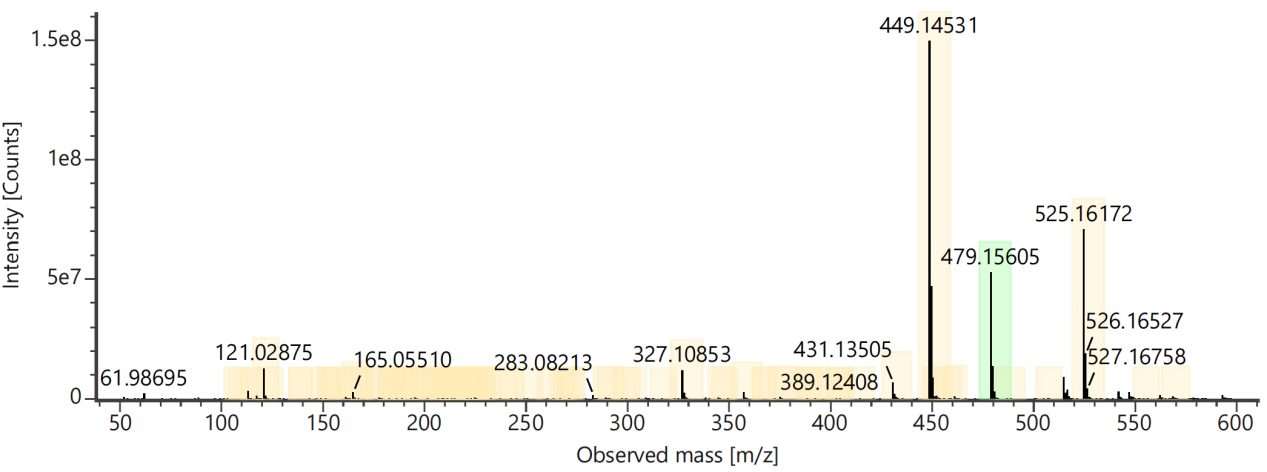


Channel name: High energy : Time 7.6809 +/- 0.0740 minutes


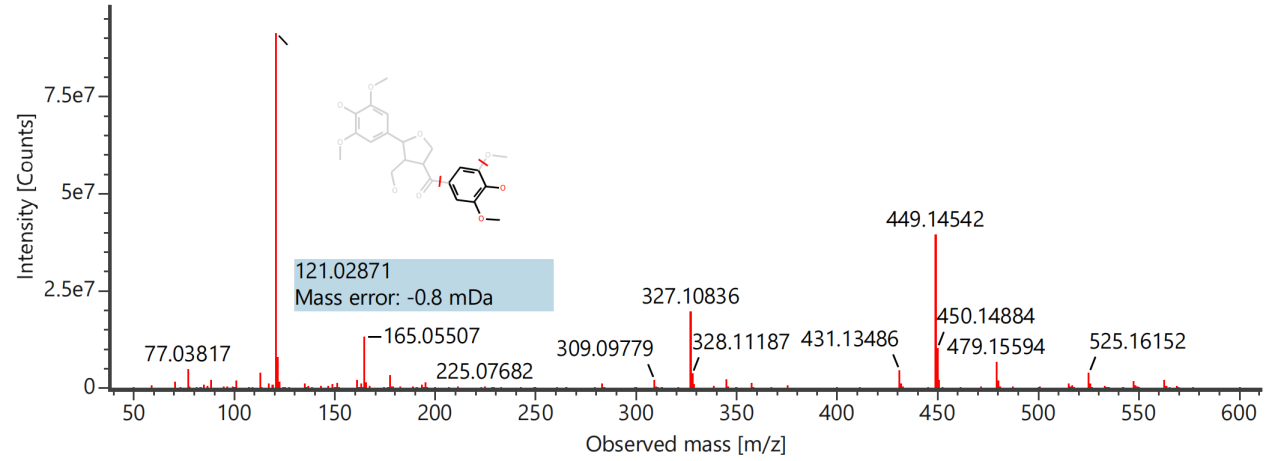


**Component name: Dendrocandin C**

Channel name: Dendrocandin C [+HCOO] : (10.00 mDa) 335.1133


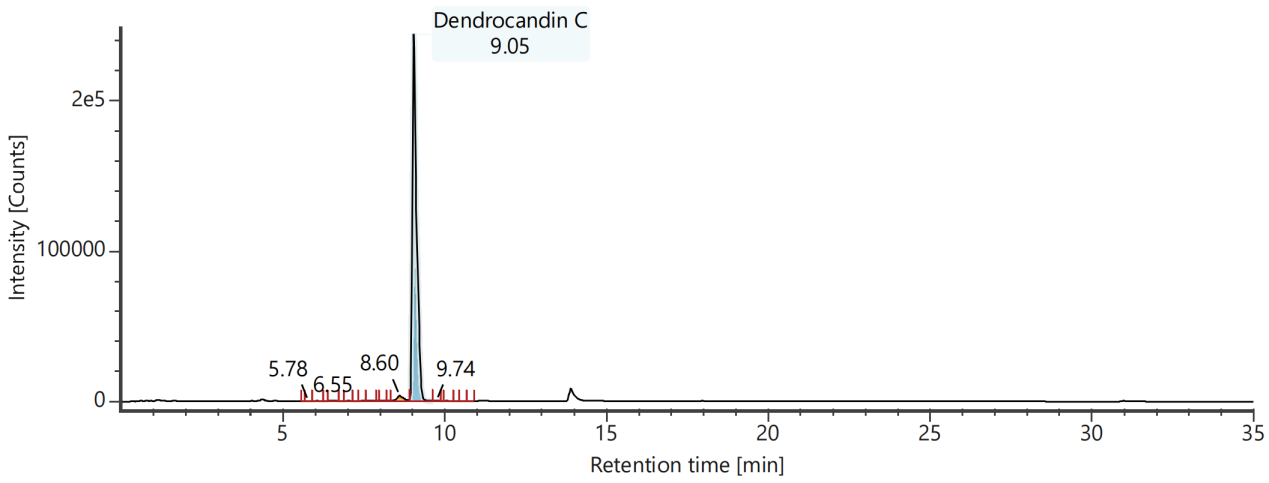


Channel name: Low energy : Time 9.0661 +/- 0.0740 minutes


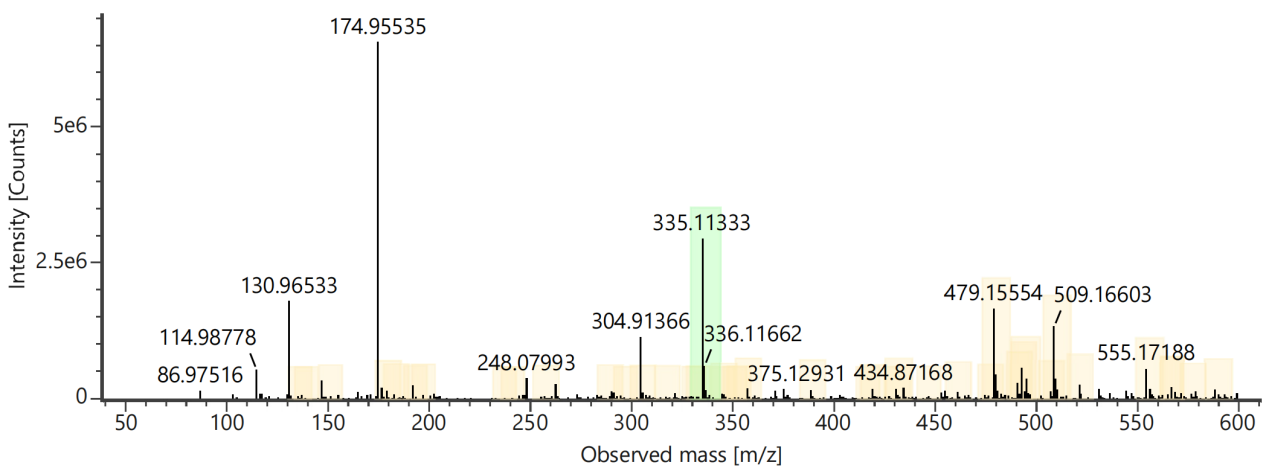


Channel name: High energy : Time 9.0661 +/- 0.0740 minutes


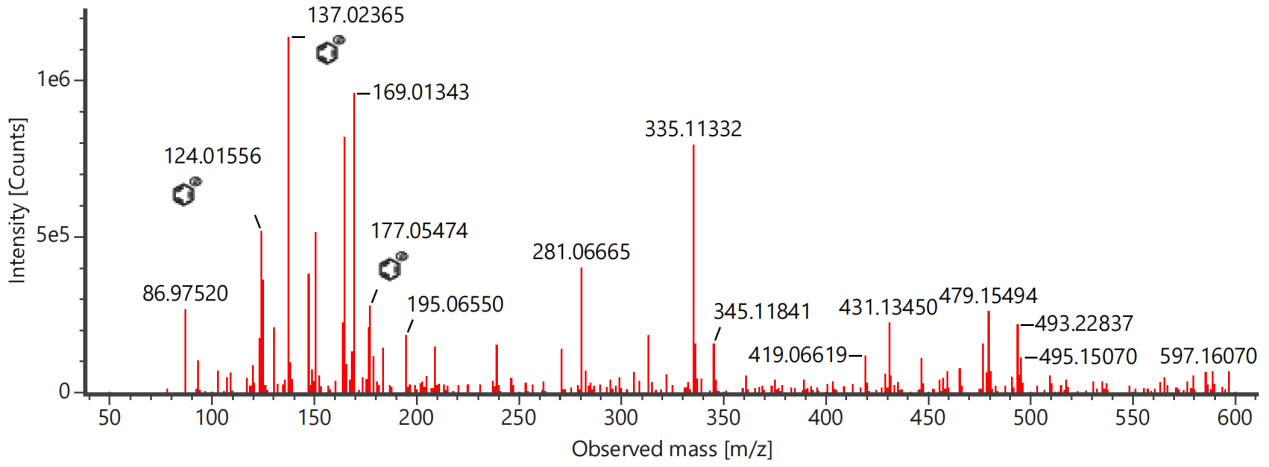


**Component name: Kushenol A**


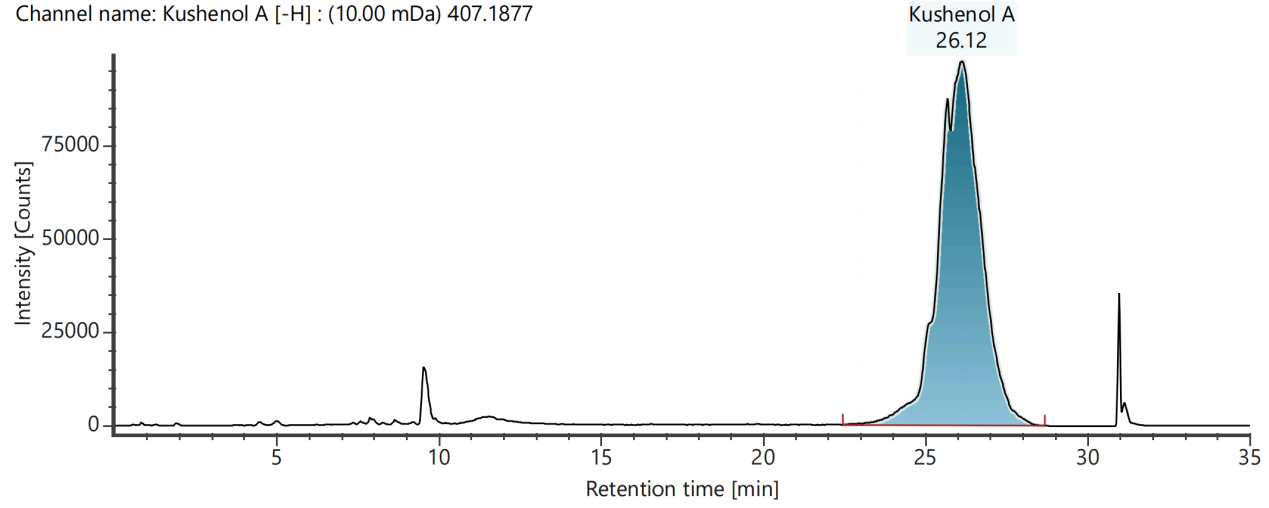


Channel name: Low energy : Time 26.1319 +/- 0.0740 minutes


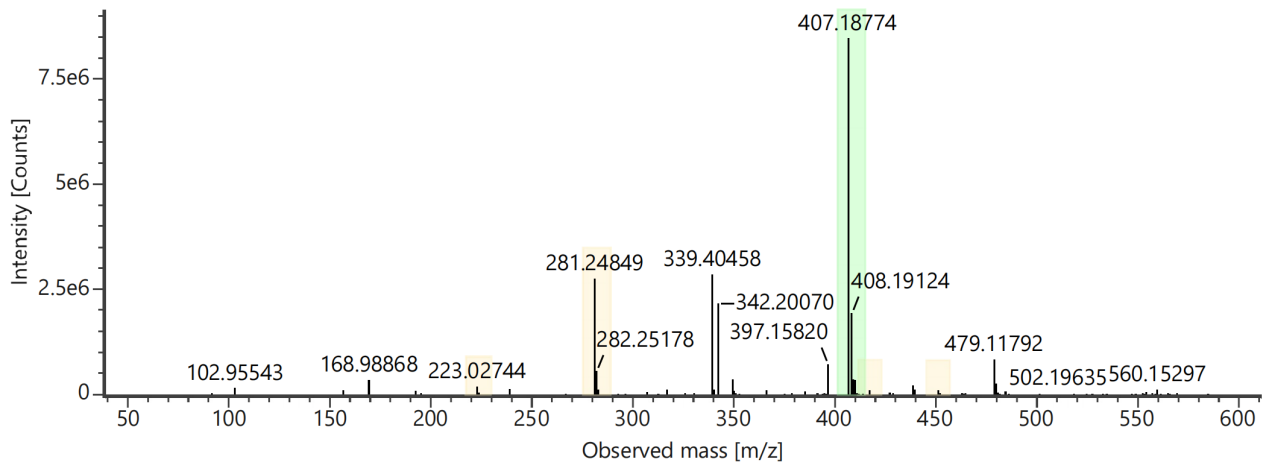


Channel name: High energy : Time 26.1319 +/- 0.0740 minutes


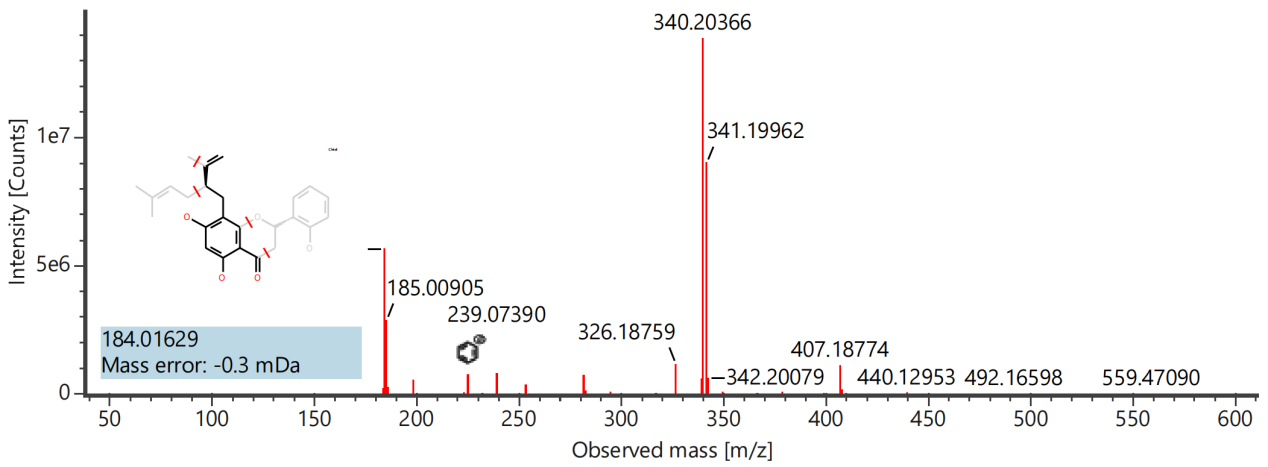


**Component name: Lactiflorin**

Channel name: Lactiflorin [-H] : (10.00 mDa) 461.1451


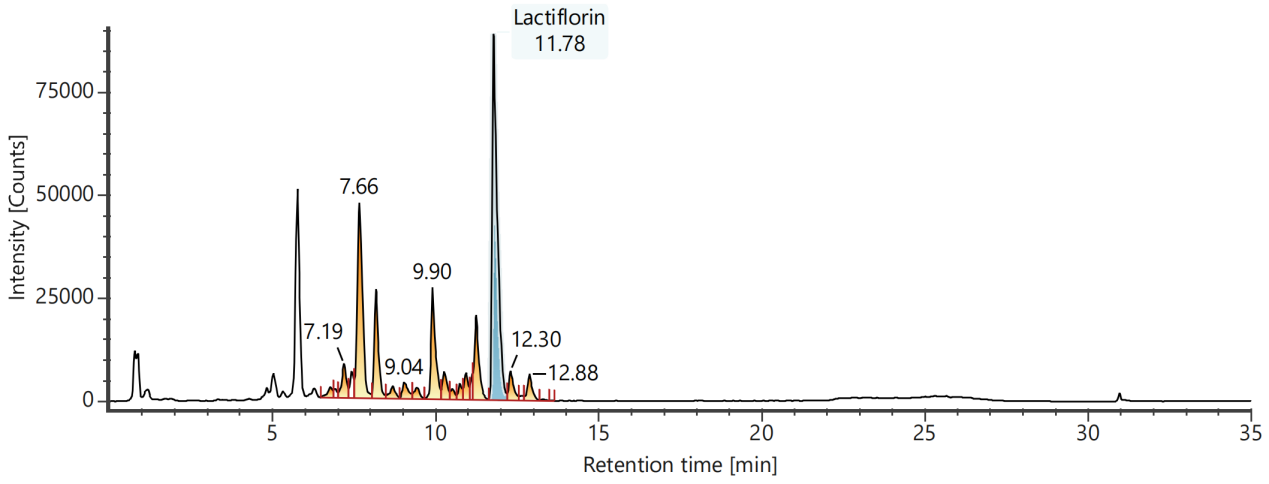


Channel name: Low energy : Time 11.7974 +/- 0.0740 minutes


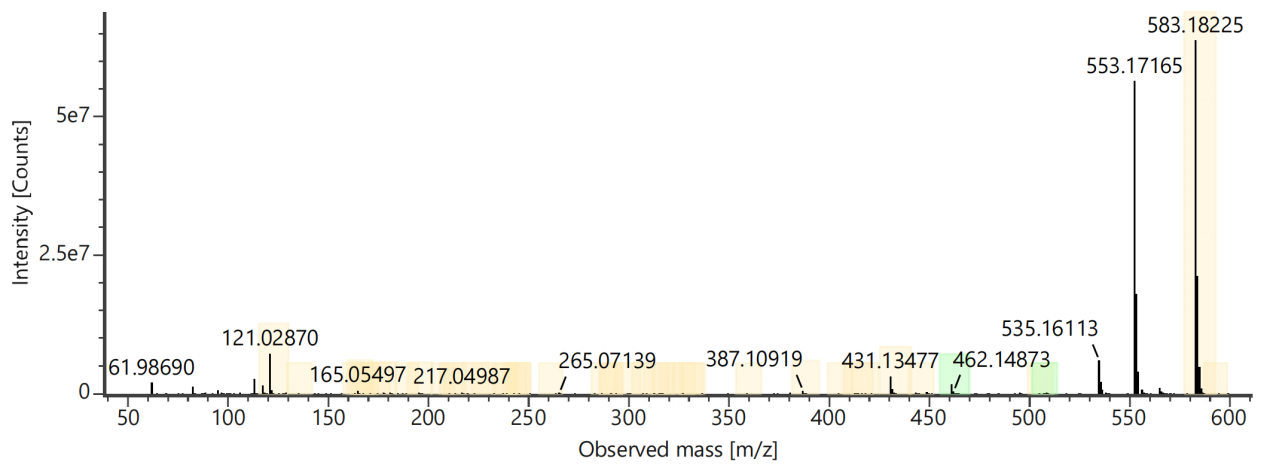


Channel name: High energy : Time 11.7974 +/- 0.0740 minutes


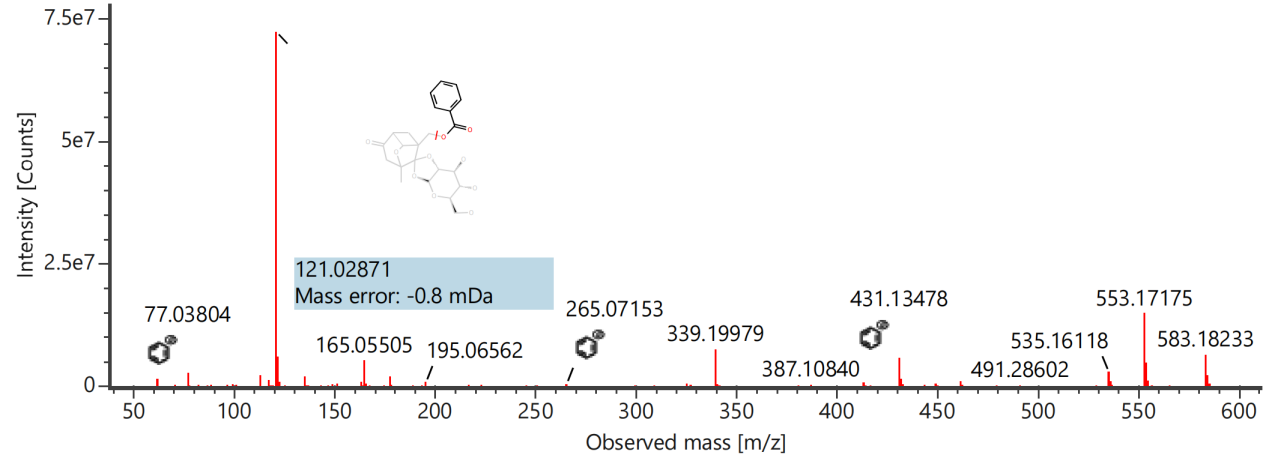


**Component name: Logaric acid (Loganic acid)**

Channel name: Logaric acid (Loganic acid) [-H] : (10.00 mDa) 375.1294


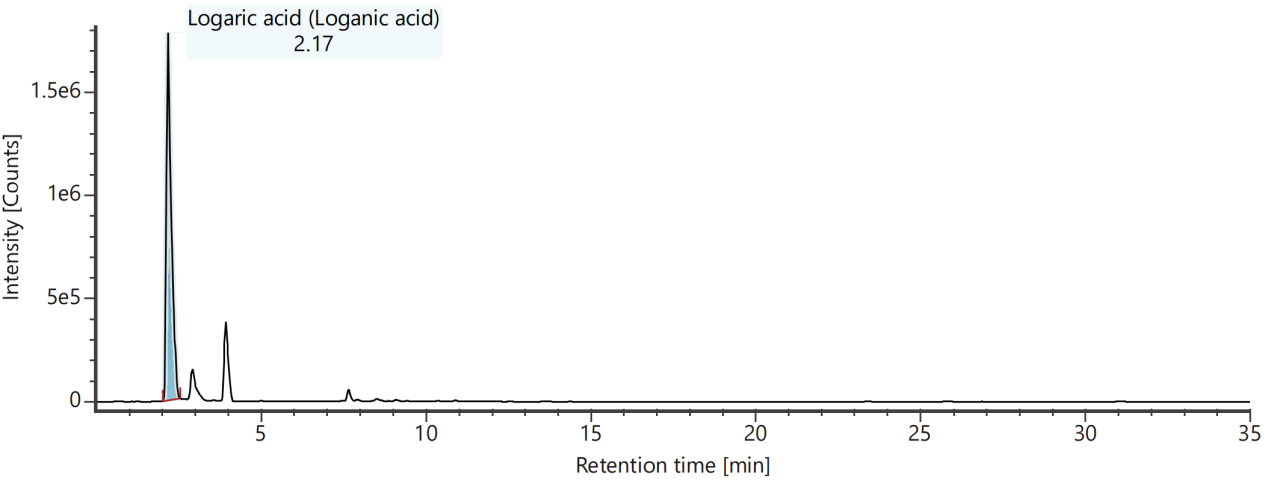


Channel name: Low energy : Time 2.1902 +/- 0.0740 minutes


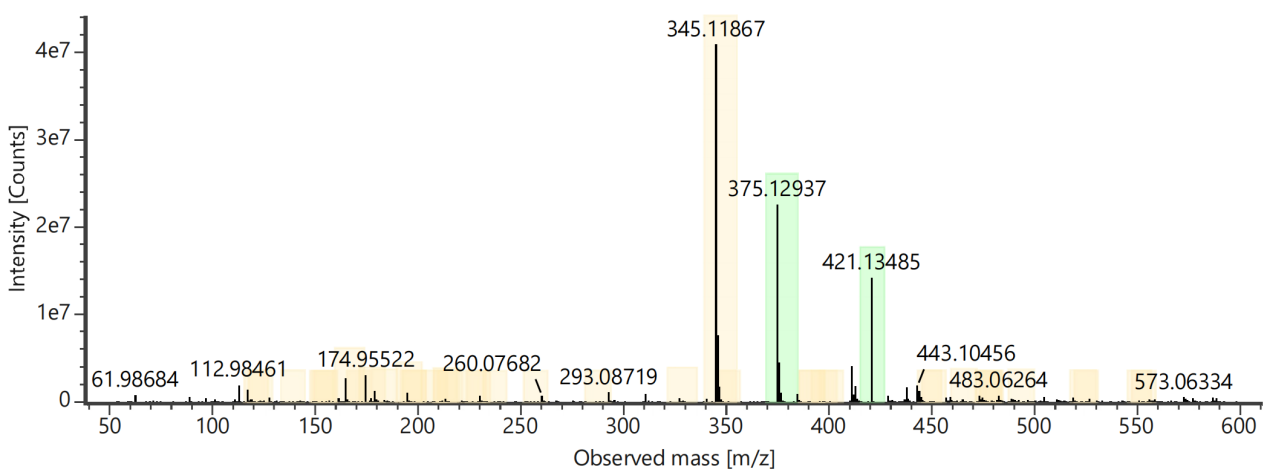


Channel name: High energy : Time 2.1902 +/- 0.0740 minutes


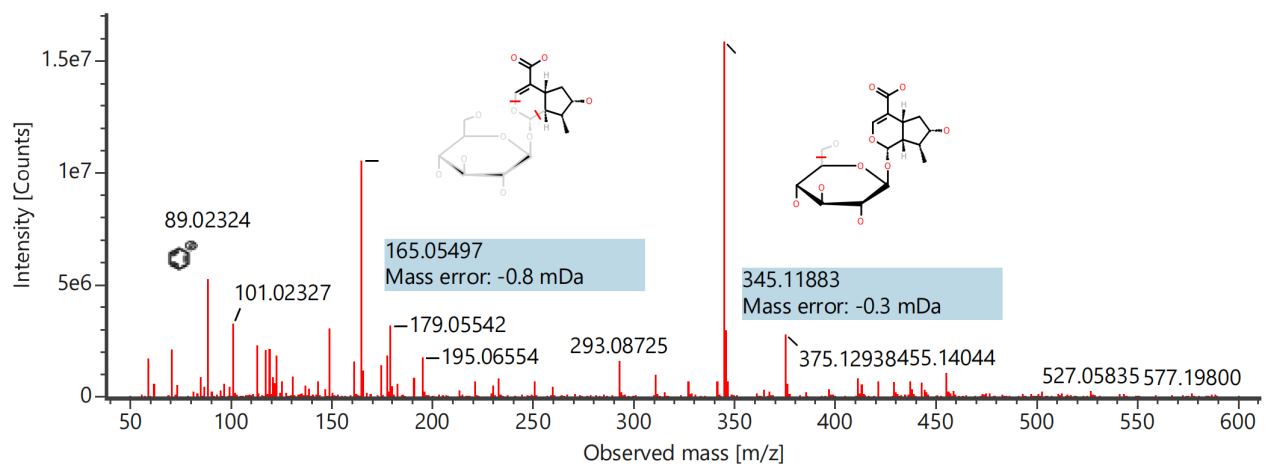


**Component name: Mahuannin G**

Channel name: Mahuannin G [+HCOO] : (10.00 mDa) 587.1171


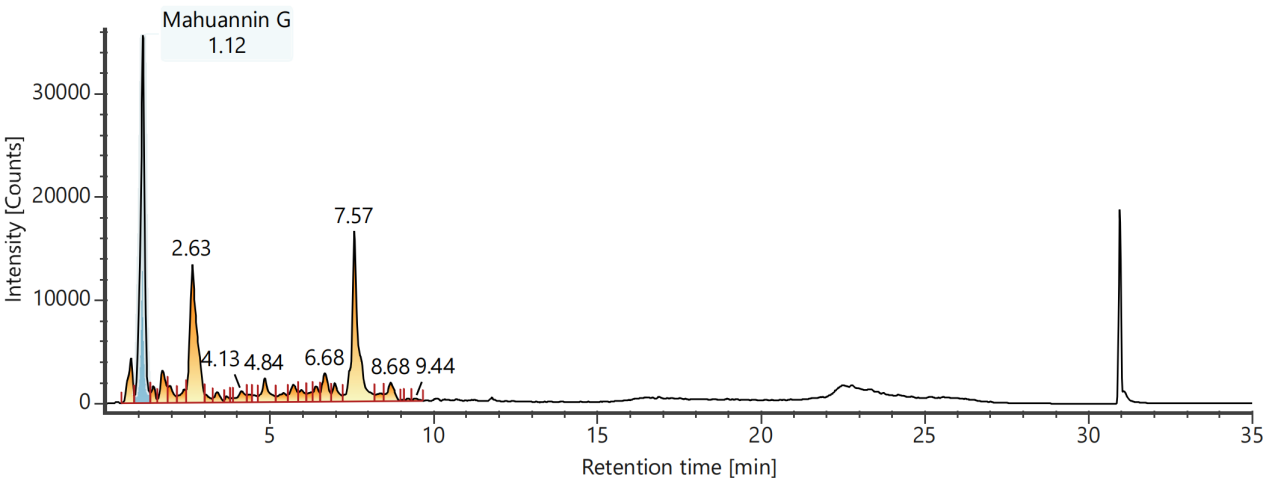


Channel name: Low energy : Time 1.1102 +/- 0.0740 minutes


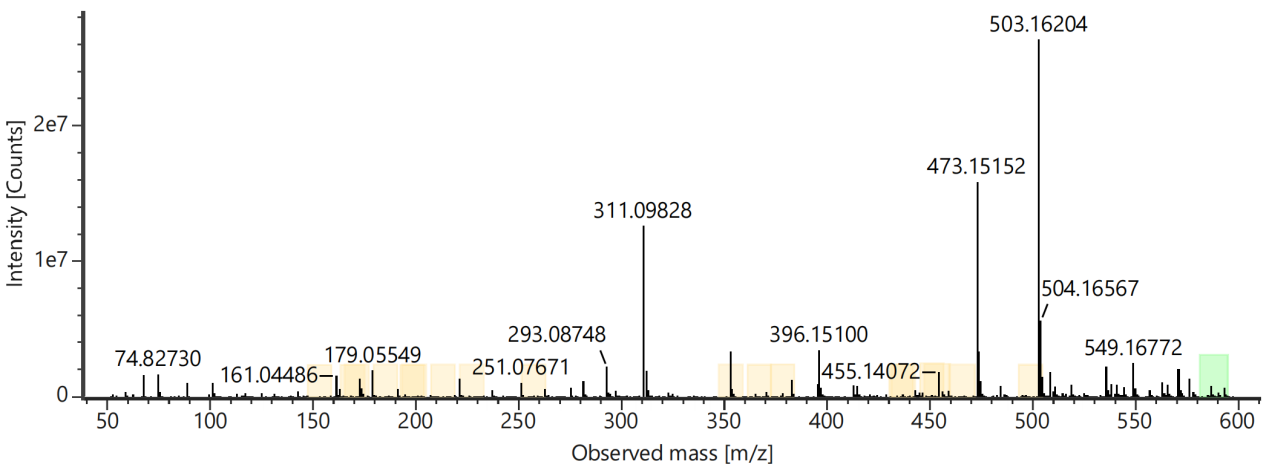


Channel name: High energy : Time 1.1102 +/- 0.0740 minutes


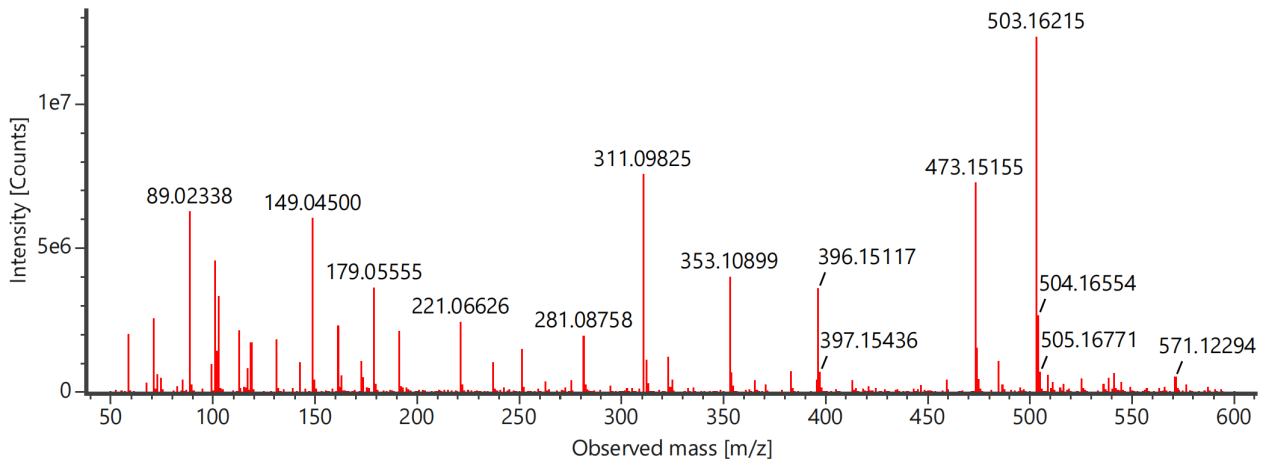


**Component name: Meliadanoside B**

Channel name: Meliadanoside B [-H] : (10.00 mDa) 327.1085


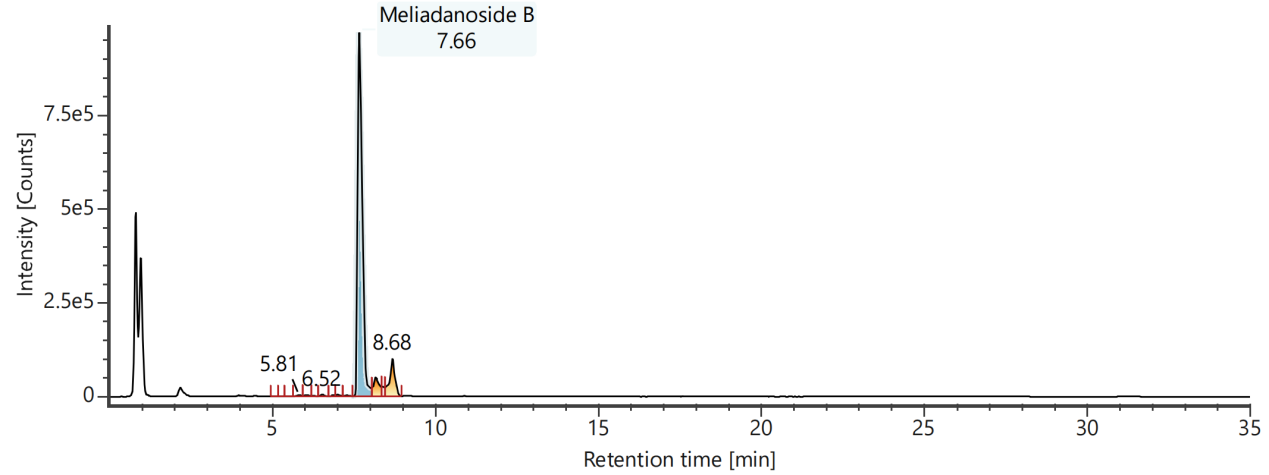


Channel name: Low energy : Time 7.6775 +/- 0.0740 minutes


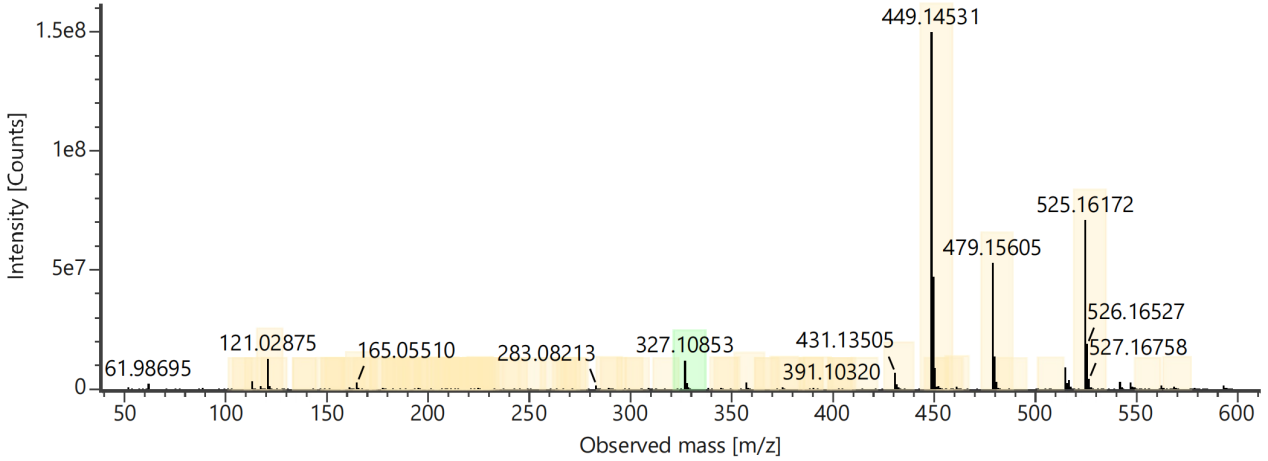


Channel name: High energy : Time 7.6775 +/- 0.0740 minutes


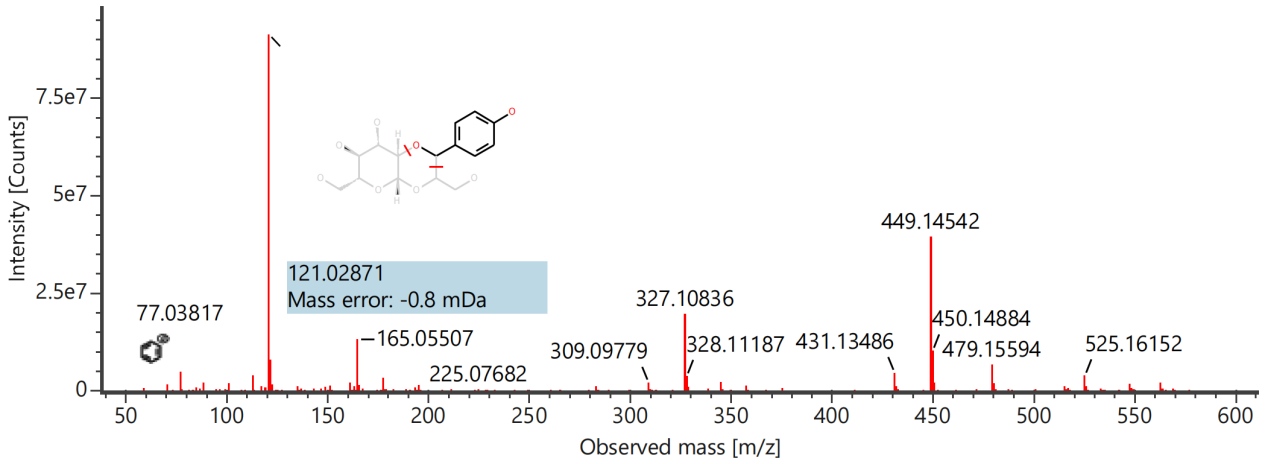


**Component name: Mudanoside B**

Channel name: Mudanoside B [-H] : (10.00 mDa) 463.1096


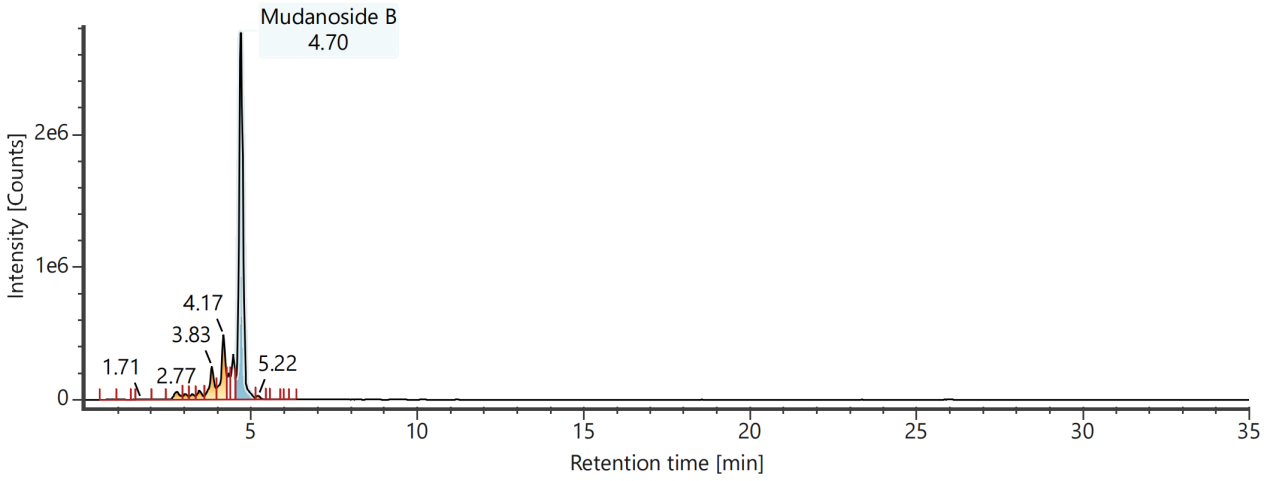


Channel name: Low energy : Time 4.7087 +/- 0.0740 minutes


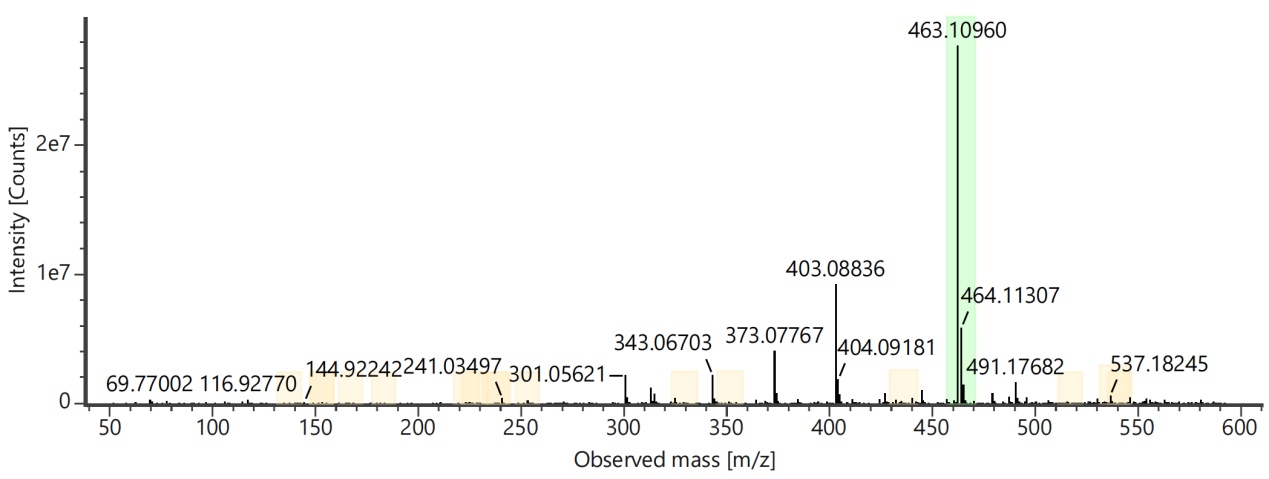


Channel name: High energy : Time 4.7087 +/- 0.0740 minutes


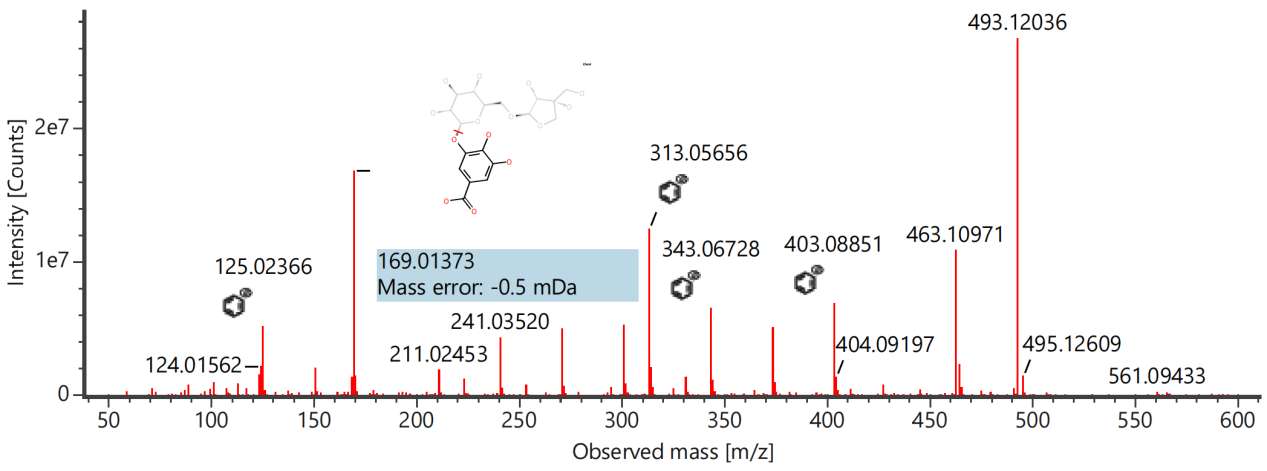


**Component name: Mudanpioside D**

Channel name: Mudanpioside D [+HCOO] : (10.00 mDa) 555.1720


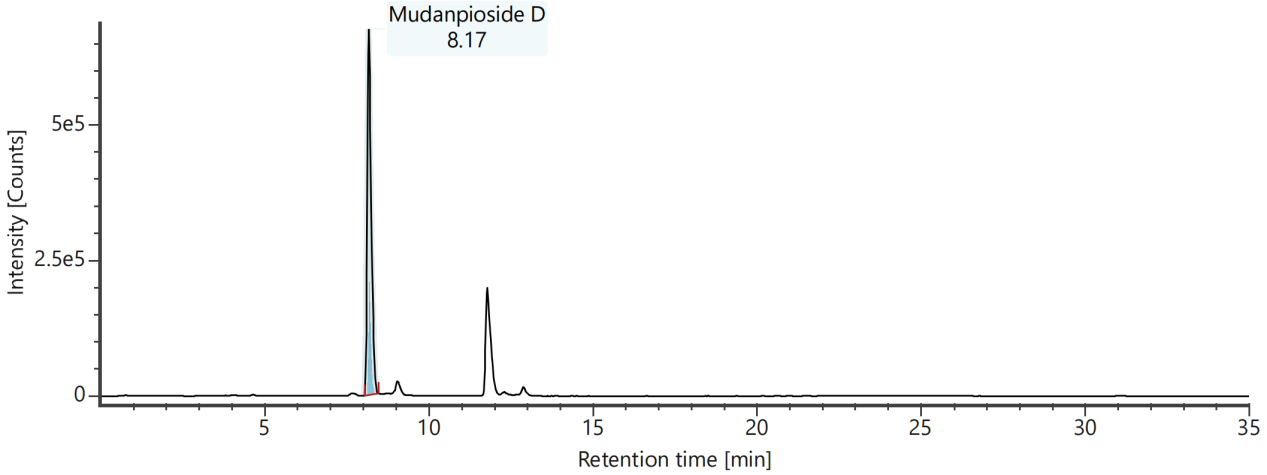


Channel name: Low energy : Time 8.1870 +/- 0.0740 minutes


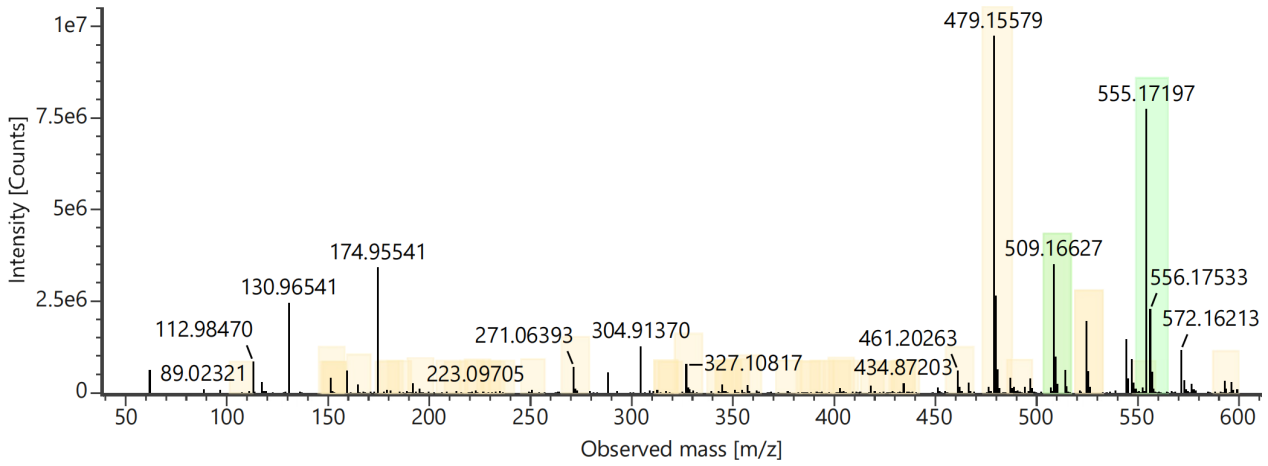


Channel name: High energy : Time 8.1870 +/- 0.0740 minutes


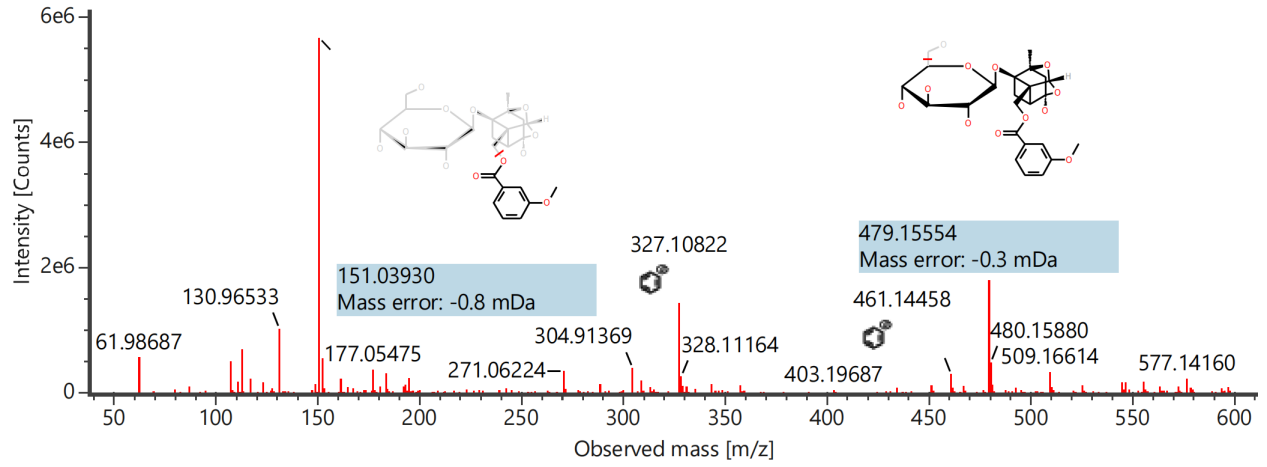


**Component name: Mudanpioside E**

Channel name: Mudanpioside E [-H] : (10.00 mDa) 525.1617


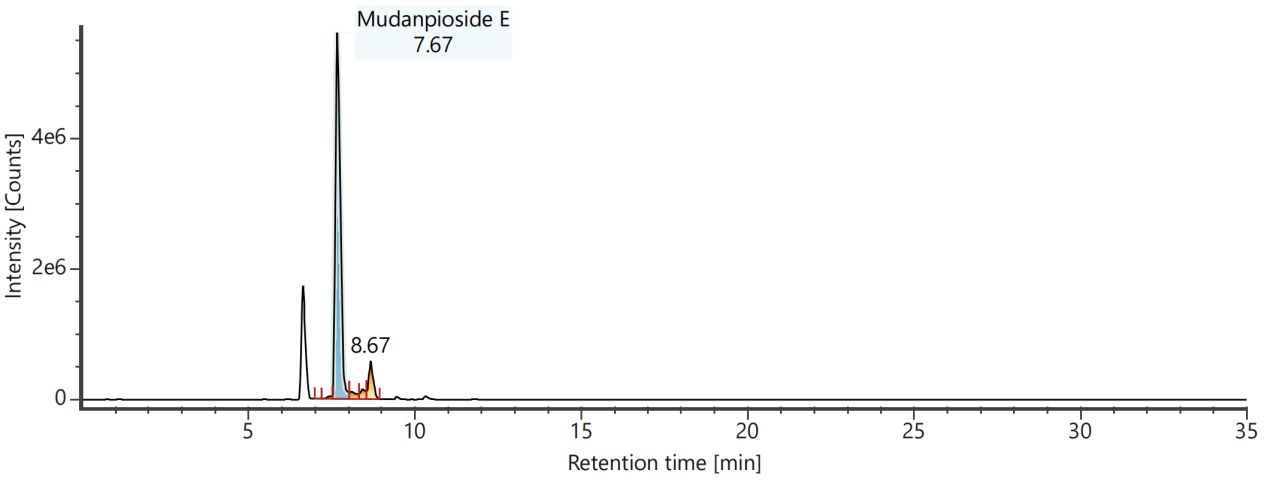


Channel name: Low energy : Time 7.6822 +/- 0.0740 minutes


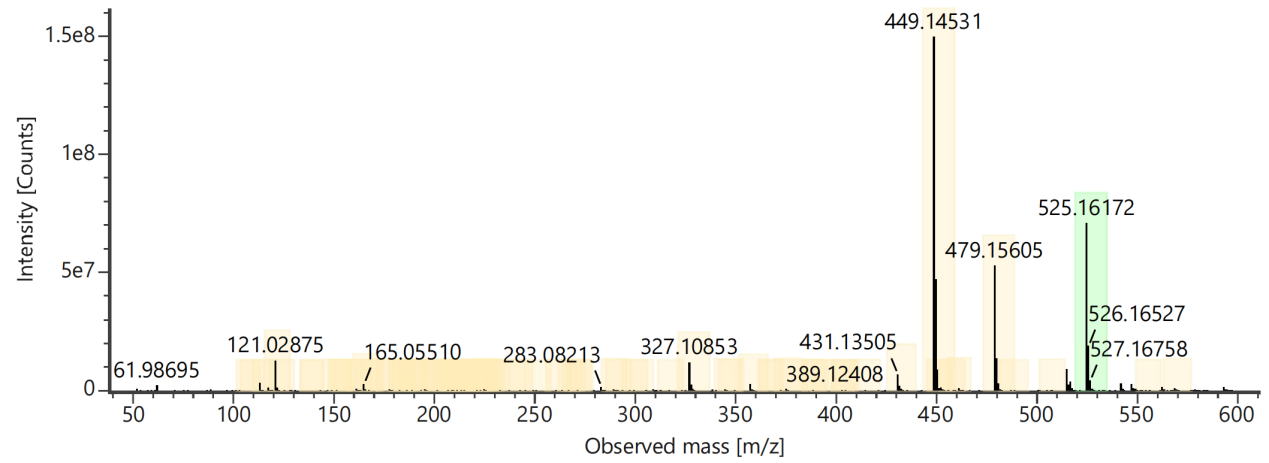


Channel name: High energy : Time 7.6822 +/- 0.0740 minutes


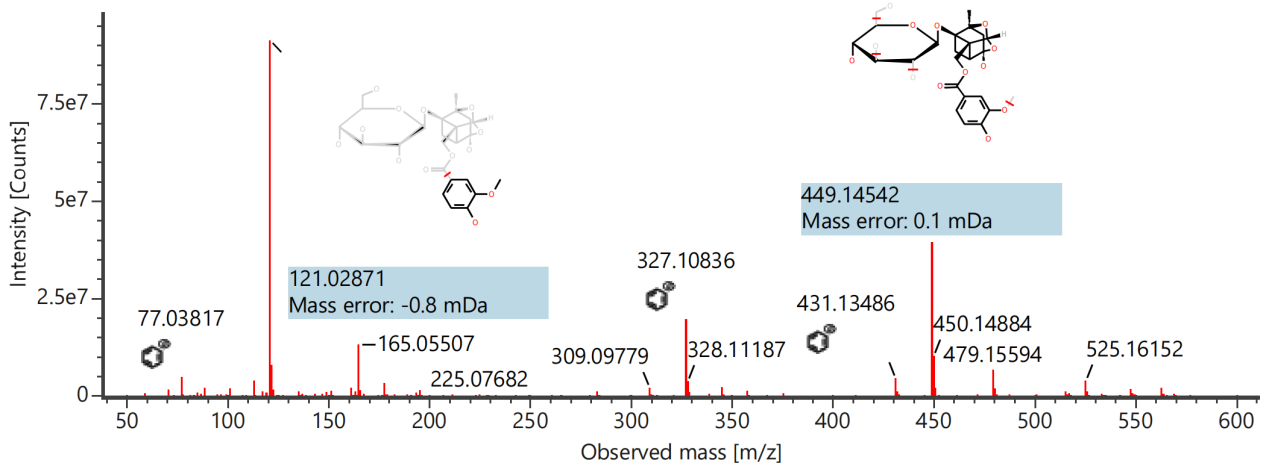


**Component name: Mudanpioside F**

Channel name: Mudanpioside F [-H] : (10.00 mDa) 343.1396


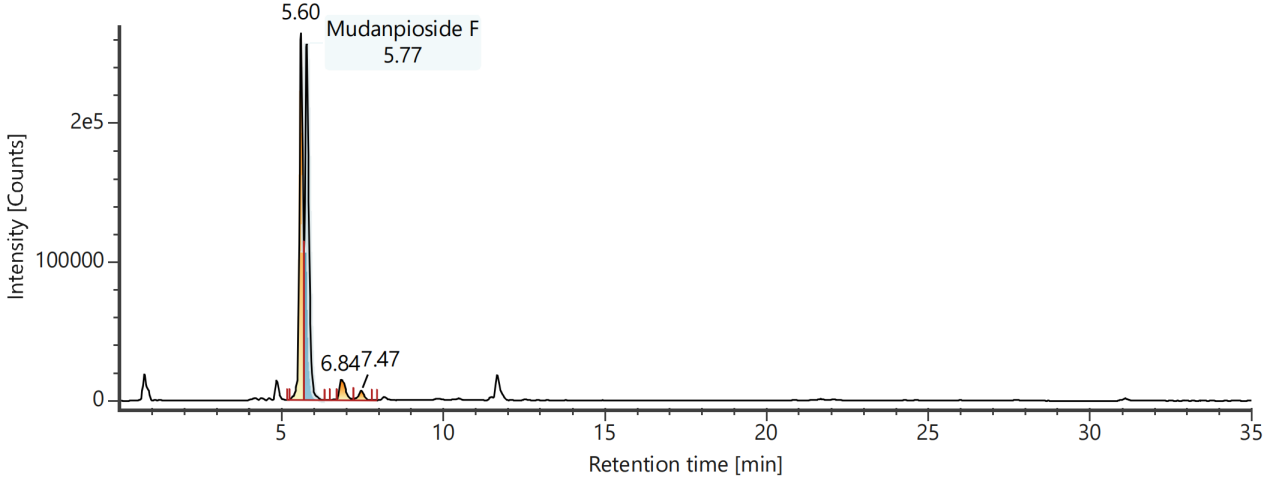


Channel name: Low energy : Time 5.7873 +/- 0.0740 minutes


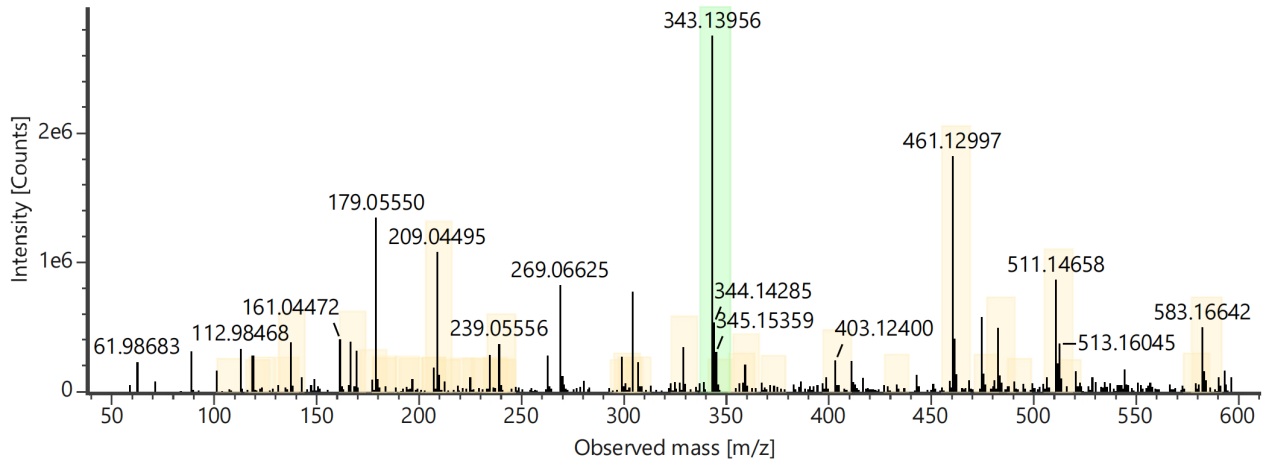


Channel name: High energy : Time 5.7873 +/- 0.0740 minutes


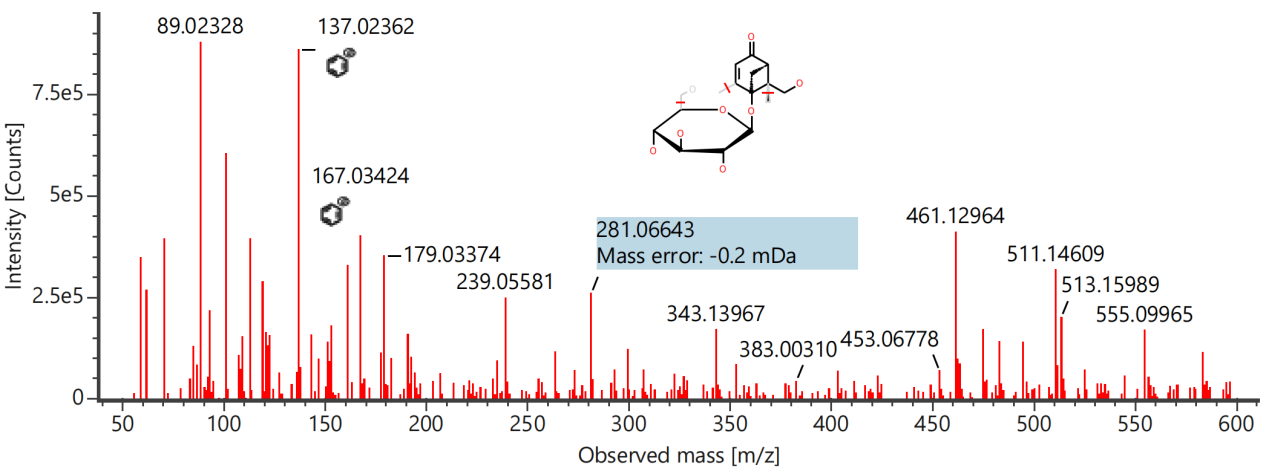


**Component name: Oleic acid**


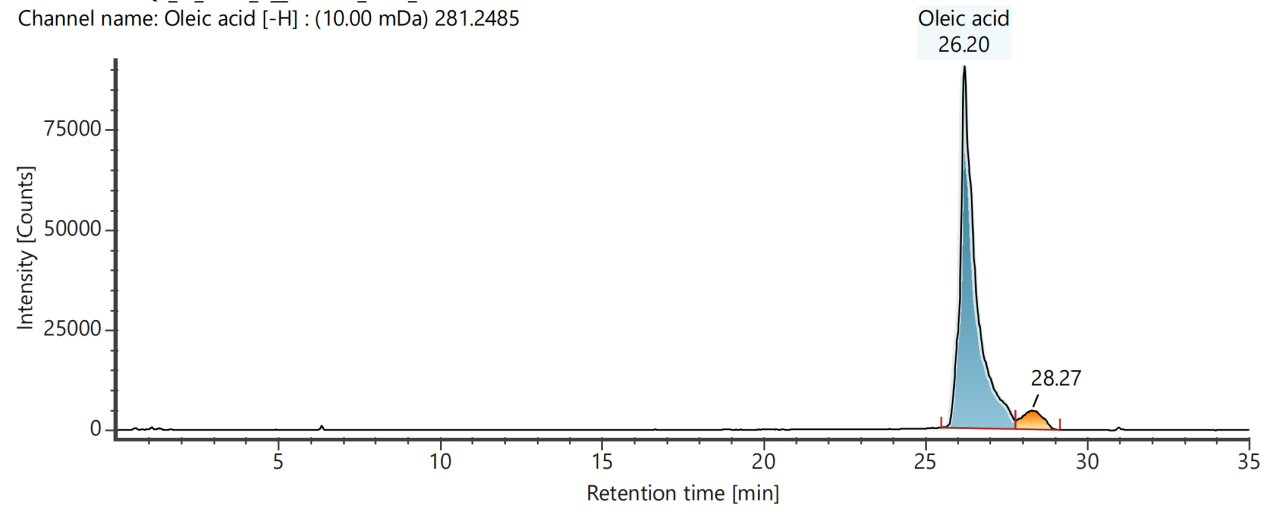


Channel name: Low energy : Time 26.1950 +/- 0.0740 minutes


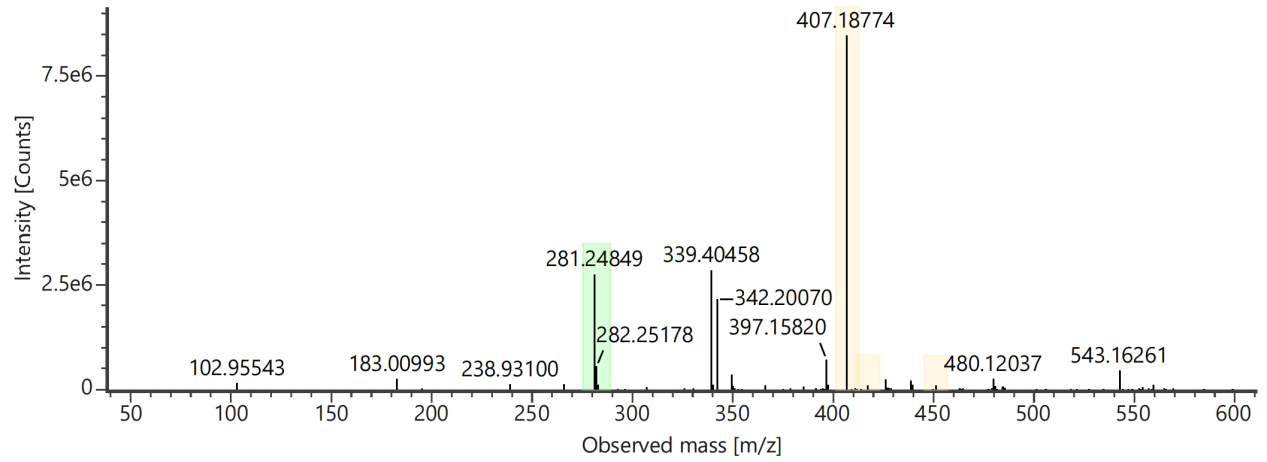


Channel name: High energy : Time 26.1950 +/- 0.0740 minutes


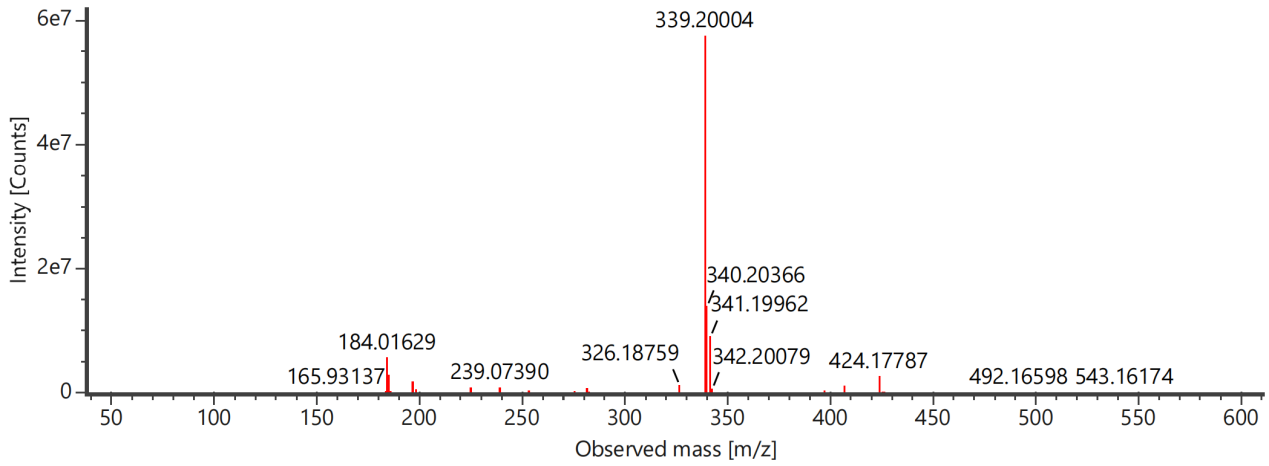


**Component name: Oxybenzoyl paeoniflorin**

Channel name: Oxybenzoyl paeoniflorin [-H] : (10.00 mDa) 599.1771


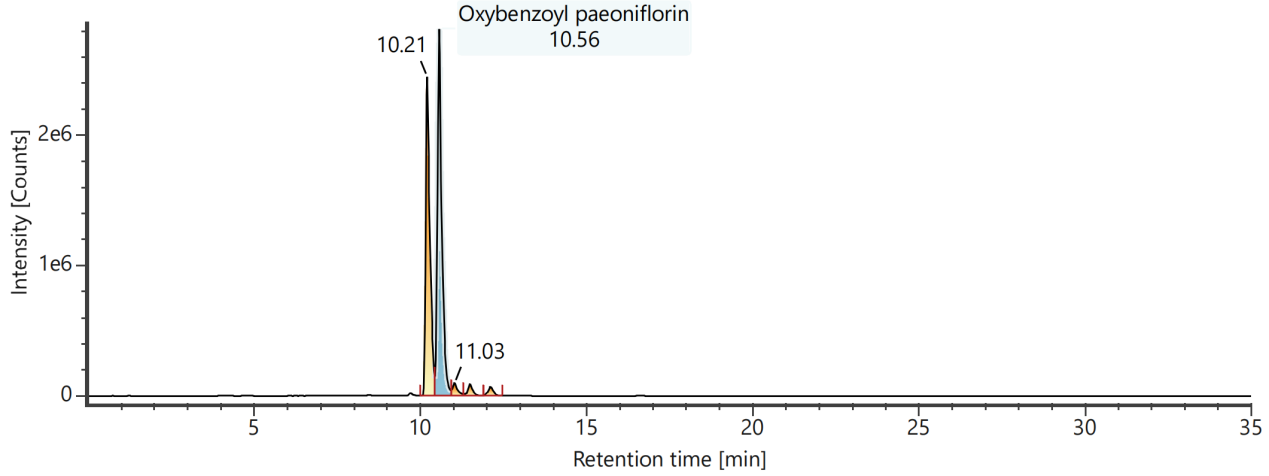


Channel name: Low energy : Time 10.5831 +/- 0.0740 minutes


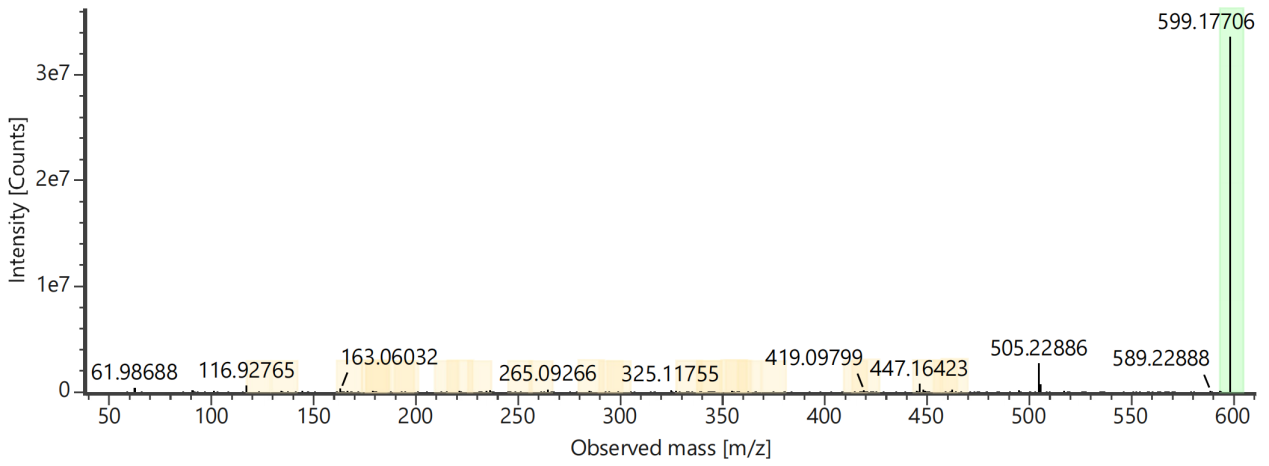


Channel name: High energy : Time 10.5831 +/- 0.0740 minutes


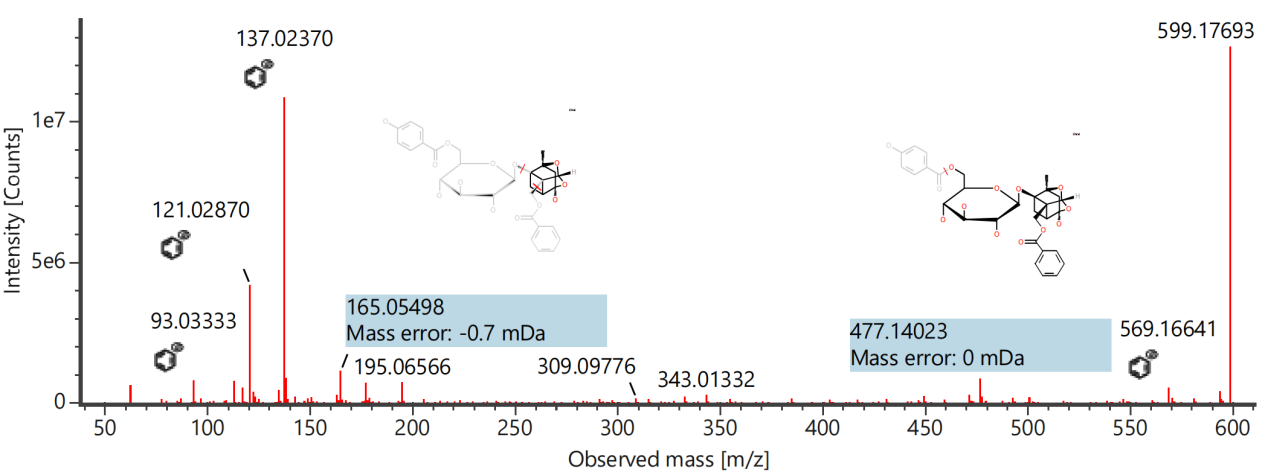


**Component name: Oxypaeoniflorin**

Channel name: Oxypaeoniflorin [-H] : (10.00 mDa) 495.1507


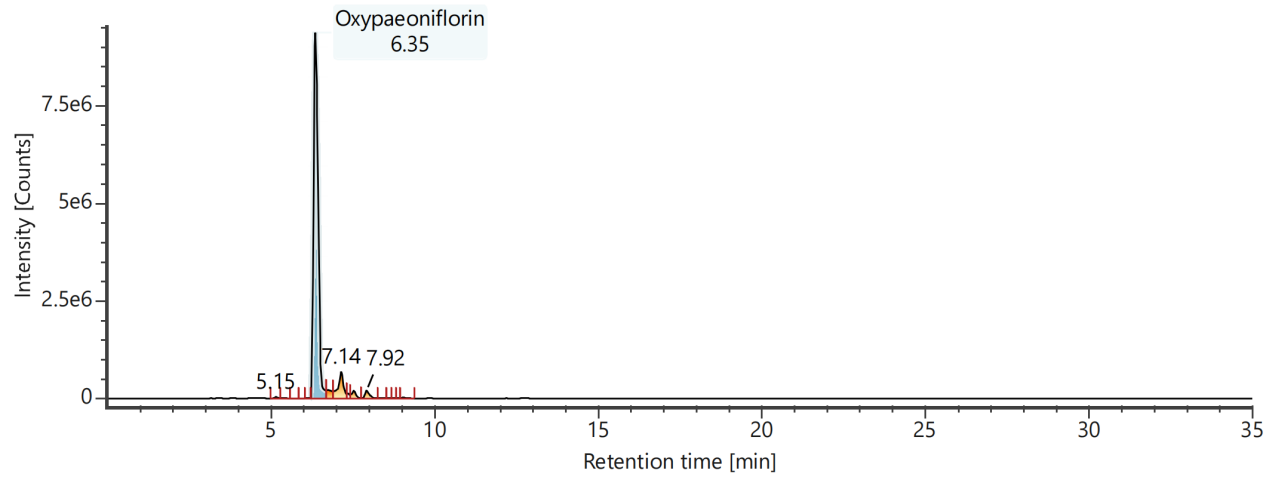


Channel name: Low energy : Time 6.3659 +/- 0.2220 minutes


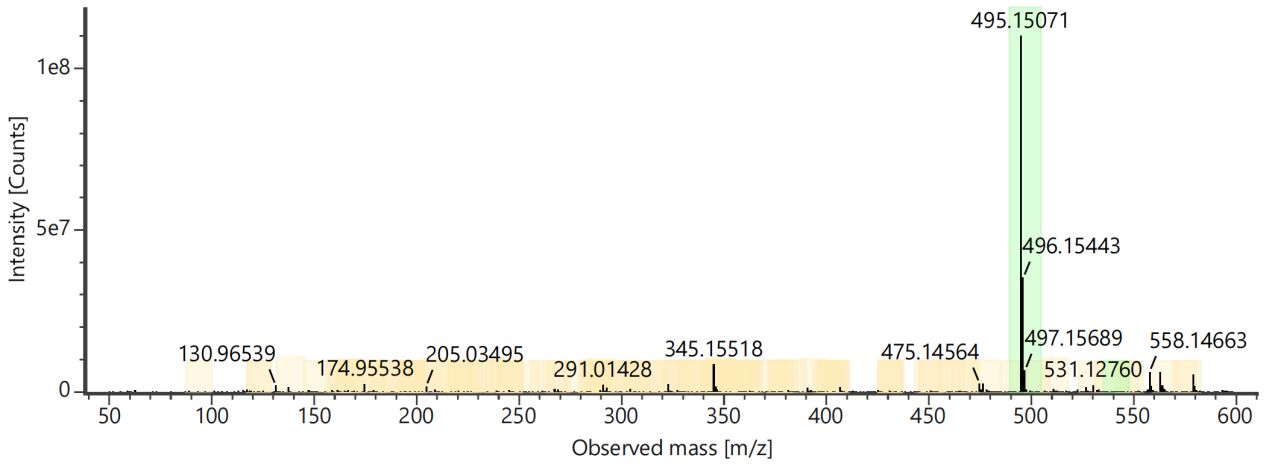


Channel name: High energy : Time 6.3659 +/- 0.2220 minutes


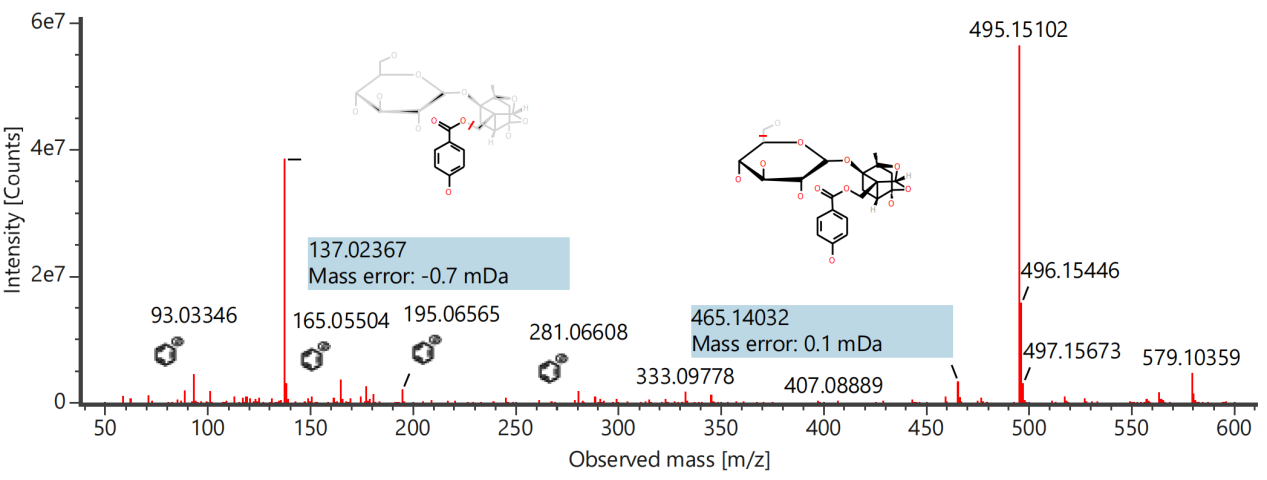


**Component name: Paeonol**

Channel name: Paeonol [-H] : (10.00 mDa) 165.0551


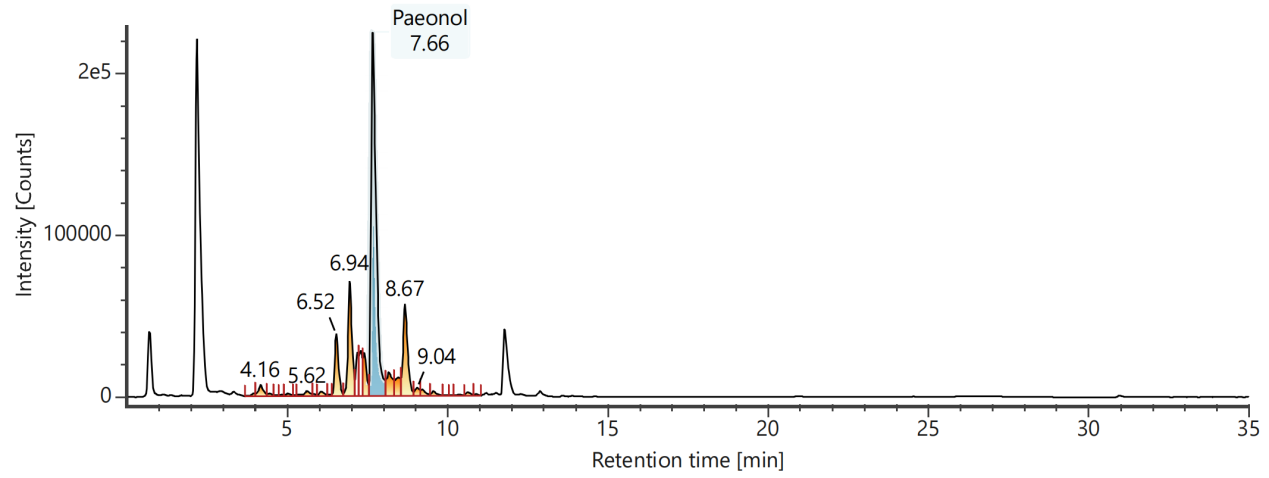


Channel name: Low energy : Time 7.6781 +/- 0.0740 minutes


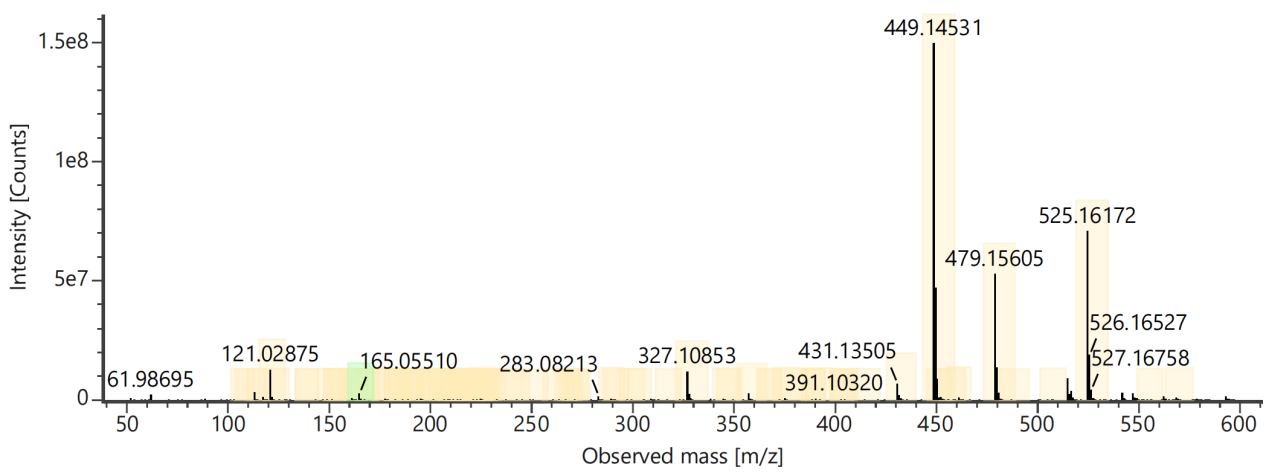


Channel name: High energy : Time 7.6781 +/- 0.0740 minutes


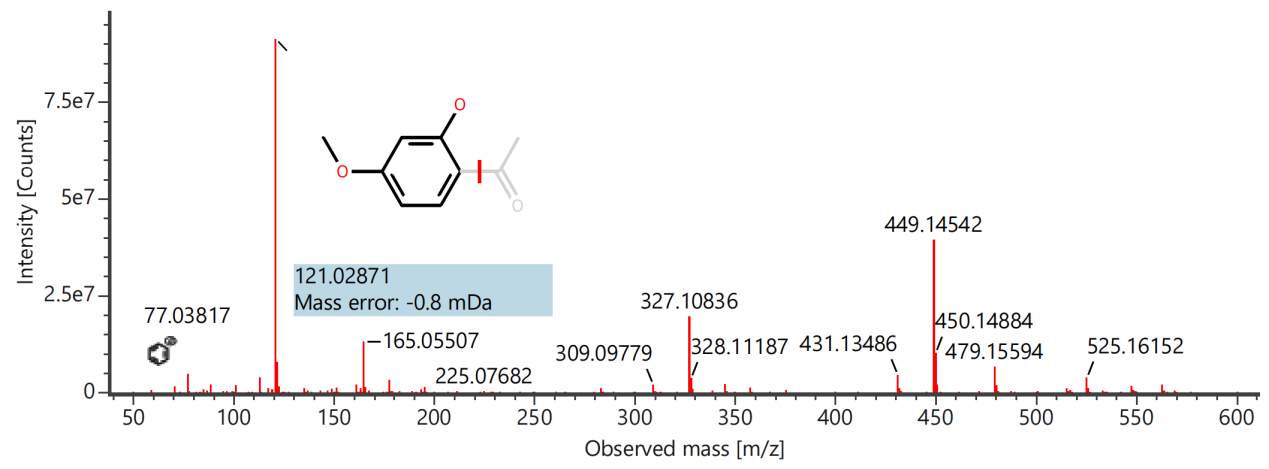


**Component name: Paeonolide**

Channel name: Paeonolide [+HCOO] : (10.00 mDa) 505.1564

Channel name: Low energy : Time 6.9471 +/- 0.0740 minutes

Channel name: High energy : Time 6.9471 +/- 0.0740 minutes

**Component name: Penstemoside**

Channel name: Penstemoside [-H] : (10.00 mDa) 405.1400

Channel name: Low energy : Time 4.0611 +/- 0.0740 minutes

Channel name: High energy : Time 4.0611 +/- 0.0740 minutes

**Component name: Picroside Ⅱ**

Channel name: Picroside Ⅱ [-H] : (10.00 mDa) 511.1456

Channel name: Low energy : Time 6.5889 +/- 0.0740 minutes

Channel name: High energy : Time 6.5889 +/- 0.0740 minutes

**Component name: Picroside Ⅲ**

Channel name: Picroside Ⅲ [-H] : (10.00 mDa) 537.1607

Channel name: Low energy : Time 4.1378 +/- 0.0740 minutes

Channel name: High energy : Time 4.1378 +/- 0.0740 minutes

**Component name: Shionoside A**

Channel name: Shionoside A [-H] : (10.00 mDa) 447.2235

Channel name: Low energy : Time 10.7215 +/- 0.0740 minutes

Channel name: High energy : Time 10.7215 +/- 0.0740 minutes

**Component name: Shionoside B**

Channel name: Shionoside B [+HCOO] : (10.00 mDa) 507.2444

Channel name: Low energy : Time 11.2136 +/- 0.0740 minutes

Channel name: High energy : Time 11.2136 +/- 0.0740 minutes

**Component name: Shionoside C**

Channel name: Shionoside C [+HCOO] : (10.00 mDa) 533.2601

Channel name: Low energy : Time 12.1618 +/- 0.0740 minutes

Channel name: High energy : Time 12.1618 +/- 0.0740 minutes

**Component name: Sweroside**

Channel name: Sweroside [-H] : (10.00 mDa) 357.1190

Channel name: Low energy : Time 7.6781 +/- 0.0740 minutes

Channel name: High energy : Time 7.6781 +/- 0.0740 minutes

**Component name: Syringylethanone**

Channel name: Syringylethanone [+HCOO] : (10.00 mDa) 241.0714

Channel name: Low energy : Time 15.5174 +/- 0.0740 minutes

Channel name: High energy : Time 15.5174 +/- 0.0740 minutes

**Component name: Uralenneoside**

Channel name: Uralenneoside [+HCOO] : (10.00 mDa) 331.0667

Channel name: Low energy : Time 3.9185 +/- 0.0740 minutes

Channel name: High energy : Time 3.9185 +/- 0.0740 minutes

**Component name: Veronicoside**

Channel name: Veronicoside [-H] : (10.00 mDa) 465.1396

Channel name: Low energy : Time 7.3595 +/- 0.0740 minutes

Channel name: High energy : Time 7.3595 +/- 0.0740 minutes
